# Supplementary material for: Cloud optical properties retrieval and associated uncertainties using multi-angular and multi-spectral measurements of the airborne radiometer OSIRIS
Source: Copernicus journal article supplement (doi:10.5194/amt-2021-414), 2022-01-20
Supplement: Supplementary file [file amt-2021-414-AC3-supplement.pdf]

# Liquid Cloud Optical Properties Retrieval and Associated Uncertainties using Multi-angular and ~~multi-spectral~~ Bispectral Measurements of the Airborne Radiometer OSIRIS

5 Christian Matar<sup>1,a</sup>, Céline Cornet<sup>1</sup>, Frédéric Parol<sup>1</sup>, Laurent C-Labonnote<sup>1</sup>, Frédérique Auriol<sup>1</sup>, and Jean-Marc Nicolas<sup>1</sup>

<sup>1</sup> [Université Lille, CNRS, UMR 8518 - LOA - Laboratoire d'Optique Atmosphérique, F-59000 Lille, France](#)

<sup>a</sup> now at: GRASP-SAS, Villeneuve d'Ascq, France

10

*Correspondence to:* Christian Matar (christian.matar@grasp-sas.com)

15

20

25

30

35

**Abstract.** In remote sensing applications, clouds are generally characterized by two properties: cloud optical thickness (COT) and effective radius of water/ice particles ( $R_{\text{eff}}$ ), and additionally by geometric properties when specific information is available. Most of the current operational passive remote sensing algorithms use a mono-angular bispectral method to retrieve COT and  $R_{\text{eff}}$ . They are based on pre-computed lookup tables while assuming a homogeneous plane-parallel cloud layer ~~and without considering measurement errors and the choice of ancillary data~~. We use the formalism of the optimal estimation method applied to airborne near-infrared high resolution multi-angular measurements, to retrieve COT and  $R_{\text{eff}}$ , and the corresponding uncertainties related to the measurement errors, to the ancillary data non-retrieved parameters, and to the cloud model assumptions. The used measurements were acquired by the airborne radiometer OSIRIS (Observing System Including Polarization in the Solar Infrared Spectrum), developed by the Laboratoire d'Optique Atmosphérique. It provides multi-angular measurements at tens of meters resolution, very suitable for refining our knowledge of cloud properties and their high spatial variability. OSIRIS is based on the POLDER (POLarization and Directionality of the Earth's Reflectances) concept as a prototype of the future 3MI space instrument planned to be launched on the EUMETSAT-ESA MetOp-SG platform in 2024<sup>3</sup>. The used approach allows the exploitation of all the angular information available for each pixel to overcome the radiance angular effects. More consistent cloud properties with lower uncertainty compared to operational mono-directional retrieval methods (~~MODIS-like method~~ traditional bispectral method) are then obtained. The framework of the optimal estimation method provides also the possibility to estimate uncertainties of different sources. Three types of errors were evaluated: (1) Errors related to measurement uncertainties, which reach 5 and 12% for high values of COT and  $R_{\text{eff}}$ , respectively; (2) errors related to an incorrect estimation of the ancillary data that remain below 0.5%, (3) errors related to the simplified cloud physical model assuming homogeneous plane-parallel cloud and the independent pixel approximation. We show that not considering the in-cloud heterogeneous vertical profiles and the 3D radiative transfer effects lead to an average uncertainty ~~ies on COT and  $R_{\text{eff}}$  of 5% and 4% for COT and of~~ 13% and 9% for  $R_{\text{eff}}$  exceeding 10%.

## 1 Introduction

The role and evolution of clouds in the ongoing climate change are still unclear. Their radiative feedbacks due to temperature rise or due to the indirect effect of aerosols are insufficiently understood and they are known to contribute to the uncertainties in the Earth future climate (IPCC report, 2021). An accurate estimation of cloud properties is therefore very important for constraining climate and meteorological models, improving the accuracy of climate forecast, and monitoring the cloud cover evolution. The instruments onboard Earth observation satellites allow continuous monitoring of the clouds and aerosols and retrieval of their properties from a regional to a global scale.

The cloud properties are retrieved using the information carried by the measurements of the reflected, emitted, or transmitted radiations by the clouds. Two main optical cloud properties are generally retrieved: the cloud optical thickness (COT) and the effective radius of the water/ice particles forming the cloud ( $R_{\text{eff}}$ ). These optical properties, along with the cloud altitude when possible, allow to characterize the clouds at a global scale and help to determine the radiative impacts of clouds along with their cooling and warming effects (Twomey, 1991; Lohmann and Feichter, 2005; Rivoire et al., 2020; Yang et al., 2010). Depending on the available information, various passive remote sensing methods are operationally used in the retrievals of these optical properties. For instance, the infrared split-window technique (Giraud et al., 1997; Inoue, 1985; Parol et al., 1991) uses infrared measurements and is more suitable for optically thin ice clouds (Garnier et al., 2012). The bispectral method (Nakajima and King, 1990) which uses visible and shortwave infrared wavelength, is more suitable for optically thicker clouds. It is currently used in a lot of operational algorithms and in particular with, for example by the MODIS radiometer (Platnick et al., 2003 2017). It is also possible to use a combination of multi-angular total and polarized measurements in the visible range, such as POLDER measurements (Deschamps et al., 1994), to retrieve COT and  $R_{\text{eff}}$  (Bréon and Goloub, 1998; Buriez et al., 1997).

The above-mentioned methods are subject to several sources of error. ~~Therefore, a~~ moderate perturbation in the retrieved COT and  $R_{\text{eff}}$  can, for example, cause variations of around 1 to 2 W/m<sup>2</sup> in the estimation of cloud radiative forcing (Oreopoulos and Platnick, 2008). The quantification of the retrieval uncertainties of these optical properties is therefore critical. The sources of errors originating from the measurements can be quite well evaluated along the instrument calibration process and are often considered when developing a new algorithm (Sourdeval et al., 2015; Cooper et al., 2003, Platnick et al. 2017) but the errors related to the choice of the cloud model to retrieve the parameters and the assumption made for the radiative transfer simulations should not be overlooked. Currently, computational constraints and lack of information in the measurements force the operational algorithms of cloud products (MODIS, POLDER, and others) to retrieve the cloud optical properties with a simplified 1D-cloud model. In this model, clouds are considered flat between two spatially homogeneous planes in what is known as the plane-parallel and homogeneous (PPH) assumption (Cahalan et al., 1994). Another commonly used assumption is related to the infinite dimension of the PPH cloud and treats each pixel independently without considering the interactions that occur between neighboring homogeneous pixels, known as the independent pixel approximation (IPA, (Cahalan et al., 1994; Marshak et al., 1995b). The effect of these two assumptions can lead to large uncertainties and ~~bias~~ biased conclusions

regarding the cloud properties (Marshak et al., 2006b; Seethala and Horváth, 2010) and the aerosol-cloud relationship (Kaufman et al., 2002; Chang and Christopher, 2016).

75 Considering the spatial variability of the cloud macrophysical and microphysical properties, the errors induced by the use of a homogeneous horizontal and vertical cloud model have been found to depend on the spatial resolution of the observed pixel, the wavelength, and the observation and illumination geometries (Kato and Marshak, 2009; Zhang and Platnick, 2011; Zinner and Mayer, 2006; Davis et al., 1997; Oreopoulos and Davies, 1998; Várnai and Marshak, 2009). From medium to large-scale observations greater than 1 km (e.g. MODIS:  $1 \times 1 \text{ km}^2$ , POLDER:  $6 \times 7 \text{ km}^2$ ), the PPH approximation poorly represents the cloud variability. The subpixel horizontal heterogeneity and the nonlinear nature  
80 of the COT-radiance relationship create the PPH bias that leads to the underestimation of the retrieved COT (Cahalan et al., 1994; Szczap et al., 2000; Cornet et al., 2018). The PPH bias is increasing with pixel size due to the inhomogeneity increase ~~inhomogeneity~~. Using the bispectral method, the COT subpixel heterogeneity induces also an overestimation bias on the retrieved  $R_{\text{eff}}$  (Zhang et al., 2012), while these heterogeneity effects appear limited with polarimetric observations (Alexandrov et al., 2012; Cornet et al., 2018). On the contrary, the microphysical subpixel  
85 heterogeneity leads to an underestimation of retrieved  $R_{\text{eff}}$  (Marshak et al., 2006b).

At smaller scales, as considered here, errors due to IPA become more dominant. At this scale, pixels can no longer be considered infinite and independent from their adjacent pixels. ~~The radiations~~ Radiative energy pass from one column to the others depending on the COT gradient. This leads to a decrease in the radiance of pixels with large optical thickness and an increase in the radiance of pixels with small optical thickness, which tends to smooth the radiative  
90 field and thus the field of retrieved COT (Marshak et al., 1995a, b). As a result, it can lead to a large underestimation of the retrieved optical thickness (Cornet and Davies, 2008). Adding to these effects, for off-nadir observations, the tilted line of sight crosses different atmospheric columns with variable extinctions and optical properties which tend to additionally smooth the radiative field (Várnai and Davies, 1999; Kato and Marshak, 2009; Benner and Evans, 2001; Várnai and Marshak, 2003; Fauchez et al. 2018). In the case of fractional cloud fields not examined under nadir observations,  
95 the edges of the clouds cause an increase in radiances for high viewing angles, which by its in turn, increases the value of the retrieved COT (Várnai and Marshak, 2007), while overestimating the retrieved  $R_{\text{eff}}$  (Platnick et al., 2003). They are often filtered out of cloud property retrievals especially under low sun angles (Takahashi et al., 2017; Zhang et al., 2019). The illumination and shadowing effects, on the contrary, lead to the roughening of the radiative field by increasing or decreasing radiances compared to the prediction of the plane-parallel homogeneous clouds. ~~†~~ Their  
100 influence in over and under-estimating the cloud droplet size retrievals are documented in several papers (Zhang et al., 2012; Marshak et al., 2006a; Cornet et al., 2005).

The assumption of a vertically ly homogeneous profile inside the cloud is also questionable. The vertical distribution of the cloud droplets is important to provide an accurate description of the radiative transfer in the cloud (Chang, 2002) and obtain a more accurate description of the cloud microphysics such as the water content or the droplet number  
105 concentration. For simplicity reasons, classical algorithms assume a vertically homogeneous cloud model. However, several studies have shown a dependence of between the retrieved effective radius ~~retrievals on~~ and the SWIR band used. These differences are explained by the non-uniformity homogenous of cloud vertical profiles and by the different sensitivities of spectral channels due to a wavelength dependent ~~the cloud particle-absorption-difference~~

(Platnick, 2000; Zhang et al., 2012). Indeed, the absorption by water droplets being stronger at 3.7  $\mu\text{m}$ , the radiation  
110 penetrates less deeply in the cloud than at 2.2 and 1.6  $\mu\text{m}$ . The use of Channel 3.7 is therefore expected to lead to retrieve an effective radius that corresponds to a level in the cloud higher than that of channels 2.2 and 1.6. Considerable vertical variation along the cloud profiles is confirmed by many in-situ studies of droplet size profiles and water content as summarized in (Miles et al., 2000). This vertical variation in liquid particle size is an important cloud parameter related to the processes of condensation, collision-coalescence, and the appearance of precipitation  
115 (Wood, 2005) . The diversity of possible vertical profiles is difficult to account for. Saito et al. (2019) propose a method to retrieve it using Empirical Orthogonal Function (EOF) to reduce the degrees of freedom of the droplet size profile.

In ~~the~~ operational algorithms, the retrieval of COT and  $R_{\text{eff}}$  is achieved through pre-computed Look-Up Tables (LUT). This method can be used to process large databases automatically. Its disadvantage is that a modification of  
120 the particle model or any other model parameter requires re-generating all these pre-~~calculated~~computed tables. In addition, until recently, the difficulty was to assess the uncertainties on the retrieved cloud properties. But most importantly it lacks also the ability to assess the uncertainties on the retrieved properties. Platnick et al. (2017) succeeded to derive the total uncertainties on COT and  $R_{\text{eff}}$  and to decompose the contribution of uncertainties from measurement errors and from several non retrieved parameters, using covariance matrix and Jacobian computations  
125 from LUT.

In this paper, we present a method ~~to overcome these drawbacks~~ based on the Optimal Estimation Method (Rodgers et al. 2000) to also derive separately each type of uncertainty and apply it to the measurements of the airborne radiometer named OSIRIS (Observing System Including Polarization in the Solar Infrared Spectrum (OSIRIS), which was developed in the Laboratoire d'Optique Atmosphérique (Lille, France Auriol et al., 2008)). OSIRIS is the  
130 airborne simulator of the 3MI (Multi-viewing Multi-channel Multi-polarization Imaging) radiometer, planned to be launched on MetOp-SG in 2024. It can measure the degree of linear polarization from 440 to 2200 nm and has been used onboard the French Falcon 20 environmental research aircraft of Safire, during several airborne campaigns: CHARMEX/ADRIDMED (Mallet et al., 2016), CALIOSIRIS and AEROCLO-sA (Formenti et al., 2019).

We couple the multi-angular multi-spectral measurements of OSIRIS with a statistical inversion method to obtain a  
135 flexible retrieval process of COT and  $R_{\text{eff}}$ . The exploitation of the additional information on the cloud provided by these versatile measurements implies the use of a more sophisticated inversion method compared to the LUT. The used algorithm is based on the optimal estimation method (Rodgers, 1976, 2000) which has been widely used for applications in cloud remote sensing (Cooper et al., 2003; Poulsen et al., 2012; Sourdeval et al., 2013; Wang et al., 2016). In this method, the ~~b~~Bayesian conditional probability together with a variational iteration method allows the  
140 convergence to the physical ~~model state which allow the forward model to that~~ best fits the measurements. Therefore, it introduces the probability distribution function of solutions where the retrieved parameter being the most probable, with an ability to extract separately uncertainties ~~ofn~~ the retrieved parameters (Whalther et Heidinger, 2012).

The aim of this paper is not to give an exhaustive view of the possible errors concerning optical thickness and effective radius retrievals but to simply introduce a method to derive the different sources of uncertainties from a

145 specific case of data acquired during an airborne campaign. Uncertainties due to error measurements, to non retrieved parameters but also to the assumed forward model are considered. If generalized to several cloudy scenes, the partitioning of the errors can help to understand if and which non-retrieved parameters or forward model need to be optimized in order to reduce the global uncertainties of the retrieved cloud parameters.

150 This article is organized as follows. Section 2 describes the basic characteristics of OSIRIS and some essential details of the campaign CALIOSIRIS-2. In section 3, a detailed description of the retrieval methodology is presented, including the mathematical framework needed to compute the uncertainties of the retrieved cloud properties. In section 4, a case study of a liquid cloud is presented and analyzed. We assessed the magnitude of different types of errors, such as the errors due to measurement noise, the errors linked to the fixed parameters in the simulations, and  
155 the errors related to the unrealistic homogeneous cloud assumption. The multi-angular retrievals and uncertainties are compared with the results obtained by the classical mono-angular bispectral retrieval algorithms (MODIS-like method) in section 5. Finally, section 6 gives a summary and some concluding remarks.

## 2 Instrumentation and airborne campaign

We use the new imaging radiometer OSIRIS. We will go through the main characteristics of the instrument and the  
160 airborne campaign CALIOSIRIS. More details about OSIRIS can be found in (Auriol et al., 2008).

### 2.1 OSIRIS

OSIRIS (Observing System Including Polarisation in the Solar Infrared Spectrum, (Auriol et al., 2008)) is an extended version of the POLDER radiometer (Deschamps et al., 1994) with multi-spectral and polarization capabilities extended to the near and short-wave infrared. This airborne instrument is a prototype of the future spacecraft 3MI\_ (Marbach  
165 et al., 2015) planned to be launched on MetOp-SG in 2024. It consists of two optical sensors, each one with a two-dimensional array of detectors; one for the visible and near-infrared wavelengths (from 440 to 940 nm) named VIS-NIR (Visible-Near Infrared) and the other one for the near and shortwave infrared wavelengths (from 940 to 2200 nm) named SWIR (Shortwave Infrared). The VIS-NIR detector contains  $1392 \times 1040$  pixels with a pixel size of  $6.45 \times 6.45 \mu\text{m}^2$  while the SWIR contains  $320 \times 256$  pixels with a pixel size of  $30 \times 30 \mu\text{m}^2$ . Adding those characteristics  
170 to the wide field of view of both heads, at a typical aircraft height of 10 km, the spatial resolution at the ground is 18 m and 58 m respectively for the VIS-NIR and SWIR. This leads to a swath of about  $25 \times 19$  km for the visible and  $19 \times 15$  km for the SWIR.

OSIRIS has eight spectral bands in the VIS-NIR and six in the SWIR. Similar to the concept of POLDER, OSIRIS contains a motorized wheel rotating the filters in front of the detectors. The step by step motor allows only one filter  
175 to intercept the incoming radiation at a particular wavelength. The polarization measurements are conducted using a second rotating wheel of polarizers. Given the sensor exposure and transfer times, the duration of a full lap is about 7

seconds for the VIS-NIR and 4 seconds for the SWIR. Figure 1 shows the spectral response of each channel of OSIRIS. The two channels (1240 and 2200 nm) used in this study are red-colored in the figure.

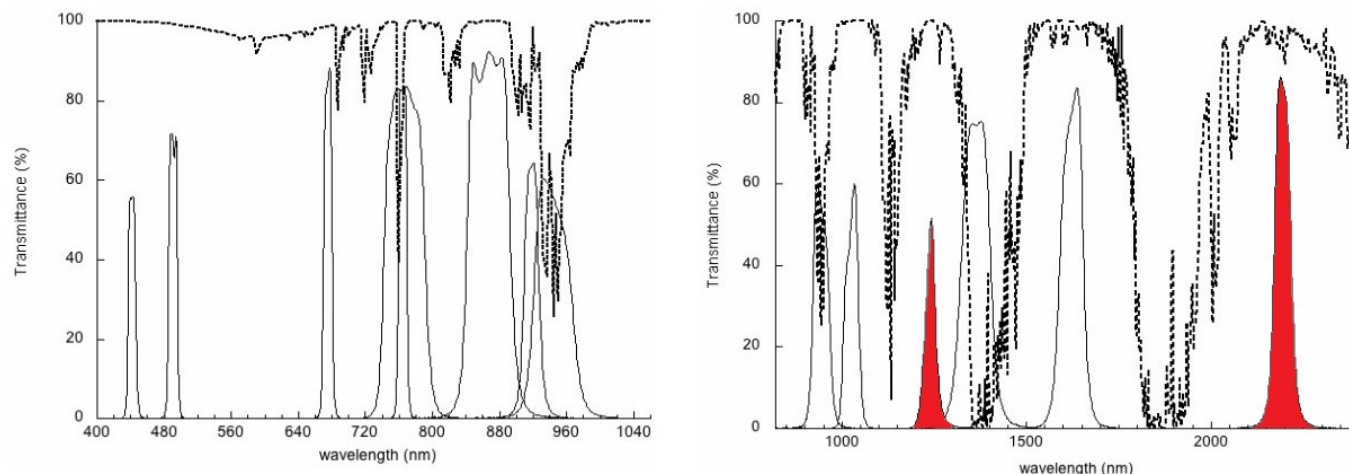

180 **Figure 1: Spectral wavelengths of VIS-NIR (left) and SWIR (right) spectral response function of OSIRIS optical channels** **OSIRIS without unit and normalized to unity.** **The dashed line corresponds to a typical atmospheric transmittance in %.** **The red-colored channels are used in this study (1240 and 2200 nm).**

OSIRIS is an imaging radiometer with a wide field of view. It has a sensor matrix that allows the acquisition of images with different viewing angles. The same scene can thus be observed several times during successive acquisitions with variable geometries. The largest dimension of the sensor matrix is oriented along-track of the aircraft to increase the number of viewing angles for the same target. For example, when the airplane is flying at 10 km altitude with a speed of 200 to 250 m/s, the same target at the ground can be seen under 20 different angles for the VIS-NIR and 19 for the SWIR.

## 2.2 Airborne campaign and case study

190 OSIRIS participated in the airborne campaign CALIOSIRIS in October 2014. It was carried out with the contributions of the French laboratories LOA (Laboratoire d'Optique Atmosphérique) and LATMOS (Laboratoire ATmosphères, Milieux, Observations Spatiales, Paris) and SAFIRE, the French Facility for Airborne Research. One objective of this campaign was the development of new cloud and aerosol properties retrieval algorithms in anticipation of the future space mission of 3MI intending to improve our knowledge of clouds, aerosols, and cloud-aerosol interactions.

The data used in this work focuses on a cloudy case over ocean surface. A marine monolayer cloud that was observed on 24 October 2014 at 11:02 (local time). The aircraft flew at an altitude of 11 km above the Atlantic Ocean facing the French west coast (46.70°, -2.82°, red arrow in Figure 2a). The solar zenith angle was equal to 59°. The LNG (lidar aerosols nouvelle generation, Bruneau et al. 2015), a high spectral resolution airborne Lidar at 355nm, was also onboard the Falcon-20 aircraft along with OSIRIS during the airborne campaign. In Figure 2b, the vertical profiles of the backscattered signal measured by the LIDAR-LNG ~~corresponds to~~ is represented. The red rectangle in Figure 2b corresponds to OSIRIS images and the scene studied in this paper. The LIDAR-LNG detected a monolayer cloud around 5.5 km. In the panels (c) and (d), we present colored compositions of total and polarized radiances

obtained from three spectral bands of OSIRIS over this cloud scene. One OSIRIS image corresponds to several viewing angles. The zenith angle ranges from about 0° in the center of the image to 55° in the corner of the image. The white concentric contours represent the scattering iso-angles in a step of 10°.

~~The cloud strongly backscatters the total solar radiation at the three visible wavelengths, producing an intense white signal. The clouds backscatter total solar radiation more intensely in the cloudbow regions near 140°. The position of the cloudbow peak depends on the wavelength, resulting in the decomposition of the light, slightly visible between the 140° and 150° scattering angle contours.~~ On the polarized image (Figure 2d), we observe a strongest directional signature of the signal, characteristic of scattering by spherical droplets showing a cloud bow clearly visible between about 140° and 150°. ~~The main structure is the peak of polarization around 140° (known as the cloud bow), which forms a white arc in Figure 2d.~~ At larger scattering angles between 150° and 160°, we observe slightly the supernumerary bows whose positions vary with the wavelength, alternating between the red, blue, and green channels. The measured polarized signal for scattering angles smaller than 130° is largely dominated by molecular scattering at 490 nm, hence the blue color. Since the solar zenith angle is 59°, the specular direction corresponds to a scattering angle of 62° in the solar plane (not visible in Figure 2c and 2d) but the ocean wind enlarges the sun glint area, resulting of an enhancement of the radiances between the 70° and 80° scattering iso-contours. ~~The ocean surface modulates the scattered total and polarized radiance and increased the signal in the specular direction as seen in the left part of Figure (e) and (d).~~

At the time of the CALIOSIRIS campaign in 2014, the polarized channels presented calibration and stray light issues, which make use of the polarized measurements difficult for quantitative retrievals. In addition, the images from the two sensors were not well co-localized. Consequently, for this work, we use two unpolarized channels of the SWIR matrix, one almost non absorbing (1240 nm) and one absorbing (2200 nm) to have information on optical thickness and effective radius respectively.

In order to use the multi-angular capability of OSIRIS, successive images have to be colocalized. After subtracting the average of similar successive images to remove the angular effects, the colocalization is achieved by minimizing the root mean square difference of the radiances between each pair of successive images for different translations along the line and the column in the second image. The reference image is the central one of the sequence. Images with translations beyond its dimensions are ignored. Multi-angular radiances at the cloud level correspond in our case to 9 to 13 directions.

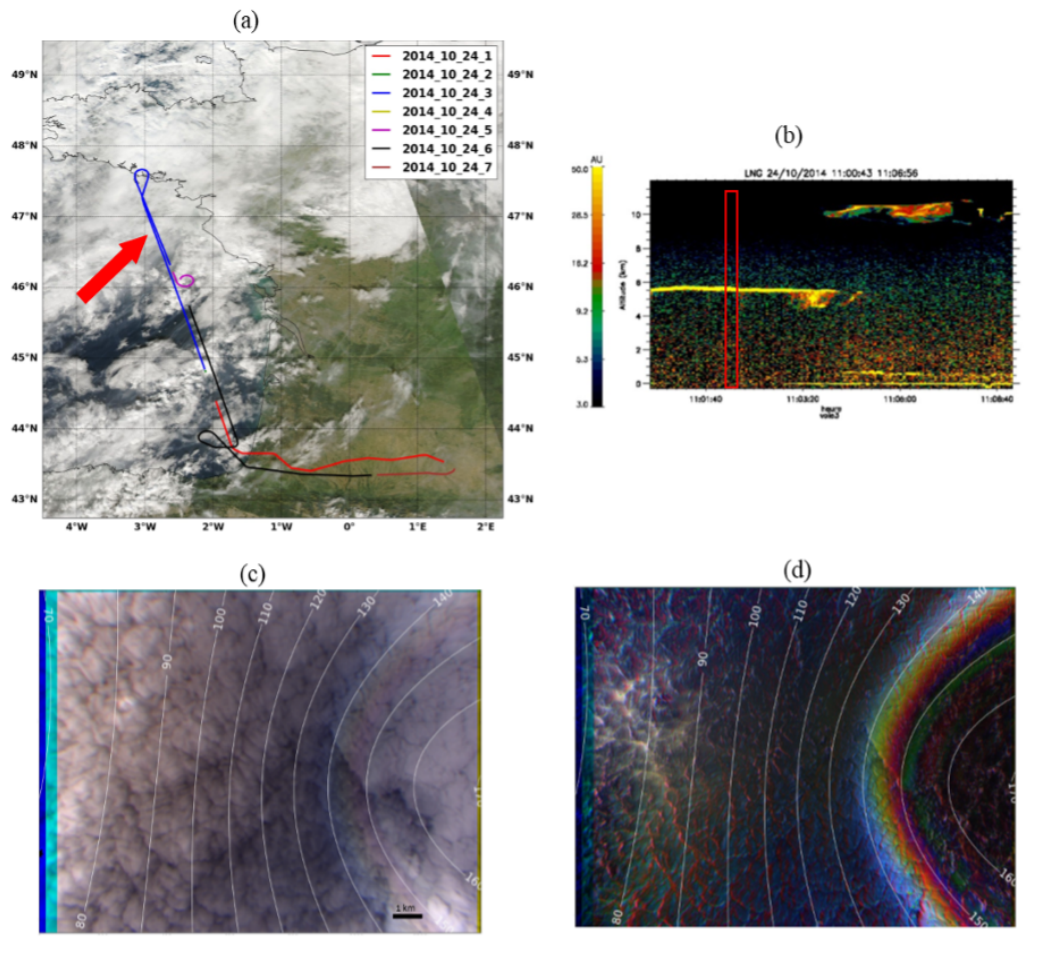

235 Figure 2: Studied case on 24 October 2014 at 10:02 UTC (11:02 local time): (a) In blue, Airplane trajectories for this day above a MODIS/AQUA true color image. The red arrow corresponds to the studied segment (b) Quicklook of the backscattered signal provided by the LIDAR-LNG around the observed scene. The red rectangle corresponds to the studied scene (c) OSIRIS true-color- RGB composite image, obtained from the total radiances at channels 490, 670, and 865 nm. The blue bars on the left hand side of the images are due to the motion of the airborne between the image acquisitions of the different filters (d) OSIRIS true-color- RGB composite image, obtained from the polarized radiances at channels 490, 670, and 865 nm. The white concentric-iso-contours in (c) and (d) represent the scattering iso-angles in a 10° step.

240

### 3 Retrieval methodology

One of the most robust approaches in cloud property retrievals is the optimal estimation method (OEM). It is increasingly used in satellite measurement inversion (Cooper et al., 2003; Poulsen et al., 2012; Walther and Heindiger, 2012, Sourdeval et al., 2013; Wang et al., 2016). It provides a rigorous mathematical framework to estimate one or more parameters from different measurements. The OEM also characterizes the uncertainty on the retrieved parameters while taking into account the instrument error and the underlying physical model errors. A complete description of the optimal estimation method for atmospheric applications is given by Clive D. Rodgers (Rodgers, 2000). In this book, Rodgers described exhaustively the information content extraction from measurements, the optimization of the inverse problem, and the solutions and error derivations. In the following, we will go through the basics of this method that define the core of our retrieval algorithm.

245

250



### 3.1 The formalism of the optimal estimation method

Considering a vector  $\underline{y}$  (of dimension  $n_y$ ) containing the measurements and a state vector  $\underline{x}$  (of dimension  $n_x$ ) containing the unknown properties to be retrieved, these two vectors are connected by the forward model  $F$ , which can model the complete physics of the measurements to an adequate accuracy. The errors associated with the measurement and the modelling are represented by the error vector  $\underline{\epsilon}$ . Eq. (1) states the relationship between these variables. Note that, hereafter, bold variables represent vectors or matrices.

$$\underline{y} = F(\underline{x}) + \underline{\epsilon} \quad (1)$$

The OEM aims to find the best representation of parameters  $\underline{x}$  that minimizes the difference between simulations  $F(\underline{x})$  and observations  $\underline{y}$  while considering the linearity of the direct model near the solution. To achieve it, a Bayesian probabilistic approach is applied. Before the measurements, an a priori knowledge of the state vector can be described by a probability density function (PDF)  $P(\underline{x})$ . Once the measurements  $\underline{y}$  has been carried out, this knowledge can be described by the posterior PDF of the state  $P(\underline{x}|\underline{y})$ , which is a conditional probability (probability of having  $\underline{x}$  given that  $\underline{y}$  is true). The posterior PDF of the state vector can be related to its a priori PDF by the Bayes' theorem:

$$P(\underline{x}|\underline{y}) = \frac{P(\underline{y}|\underline{x}) \cdot P(\underline{x})}{P(\underline{y})} \quad (2)$$

Where  $P(\underline{y})$  is the PDF of the measurements including the uncertainties and  $P(\underline{y}|\underline{x})$  is the PDF of the measurements given that we know the state vector.

In the optimal estimation method, the previous PDFs are represented by Gaussian distributions, assuming that the errors of the measurements, the errors related to the non-retrieved parameters and the errors of the forward model are normally distributed around a mean value. In other words, we assume that the model can be linearized around the most probable state vector.

Therefore, it can be easily shown that the best estimate of the ~~properties~~state vector  $\underline{x}$  corresponds to the minimum of the so-called cost function  $J(\underline{x})$ :

$$J(\underline{x}) = [\underline{y} - F(\underline{x})]^T S_{\epsilon}^{-1} [\underline{y} - F(\underline{x})] + [\underline{x} - \underline{x}_a]^T S_a^{-1} [\underline{x} - \underline{x}_a] \quad (3)$$

The first term of  $J(\underline{x})$  represents the difference between the measurements and the forward model calculated for a given state vector  $\underline{x}$ , weighted by  $S_{\epsilon}$  the covariance matrix associated with the measurement error and the forward model. The second term represents the difference between the state vector  $\underline{x}$  and the a priori state vector  $\underline{x}_a$  weighted by  $S_a$  the covariance matrix associated with  $\underline{x}_a$ . In line with the cost function, the optimal ~~state~~ estimation emerges from a balance between the information carried by the measurement about the state ~~vector~~ and what we already know about it before the measurement. In our case, we do not have a prior estimate of the state vector. The iterations are initiated by a first guess while applying a large  $S_a$ . The difference between the measurements and the forward model

280 will be the decisive element in the minimization of the cost function. It will ensure that the estimated cloud properties have the optimal fit with the observed system only.

The minimization is done through the Levenberg-Marquardt approach (Marquardt, 1963; Levenberg, 1944) based on the “Gauss-Newton” iterative method. Assuming the model is nearly linear around a given state vector, Each iteration is calculated following the Eq. (4):

$$285 \quad x_{i+1} = x_i + S_{x_i}^{-1} \left[ K_i^T S_e^{-1} (y - F(x_i)) - S_a^{-1} (x_i - x_a) \right] \quad (4)$$

where  $x_i$  is the state vector at the  $i_{th}$  iteration,  $K_i$  is the sensitivity (or Jacobian) matrix described in Eq. (10) and  $S_{x_i}$  is the covariance matrix of the state vector defined in Eq. (5).

$$S_{x_i} = \left[ (1+\gamma) S_a^{-1} + K_i^T S_e^{-1} K_i \right]^{-1} \quad (5)$$

The parameter  $\gamma$  affects the size of the step at each iteration. If the cost function increases at an iterative step  $i$  then  $\gamma$  is increased and a new smaller step ( $x_{i+1}$ ) is calculated until the cost function decreases.

290 The iterative process stops when the simulation fits the measurement (Eq. (6)), named convergence of Type 1 or when the iteration converges (Eq. (7)) named convergence of Type 2. The left side of Eq. (6) represents the normalized cost function without taking into account the a priori negligible contribution. When the cost function and should be is smaller than  $n_y$  or the normalized cost function ( $J/n_y$ ) less or equal to one, to stop the iterations stop.

Eq. (7) deals with the iterative steps and will make sure that the iterations will stop when the difference between two successive steps weighed by  $S_x$  is less than  $n_x$ . In other words, when further changes in the state vector have small to zero changes in the minimization.

$$\left[ y - F(x_i) \right]^T S_e^{-1} \left[ y - F(x_i) \right] / n_y \leq 1 \quad (6)$$

$$\left[ x_i - x_{i-1} \right]^T S_x \left[ x_i - x_{i-1} \right] / n_x \leq 1 \quad (7)$$

300 When neither the inequality of Eq. 6 nor the inequality of Eq. 7 is reached after 15 iterations, the retrieval is considered as a failed retrieval.

### 3.2 Basic setting of the retrieval algorithm

305 In order to apply this theoretical framework into our retrieval algorithm, we define next the basic elements stated in the previous subsection.

The state vector  $x$  contains the properties to be retrieved. In our case, they are the cloud optical thickness (COT) and the effective radius of water droplets ( $R_{eff}$ ):

$$x = \begin{bmatrix} \text{cot} \\ R_{eff} \end{bmatrix} \quad (8)$$

310 It can be noted because the relationship between radiances and optical thickness has a logarithmic shape, using  $\log(COT)$  instead of  $COT$  in the state vector could have accelerated the convergence.

The a priori state vector was set to  $[10, 10\mu\text{m}]$  and the a priori covariance matrix  $S_a$  was set to  $10^8$ . The latter was chosen very large in order to favor the measurements in the determination of the state vector (no a priori constraint).

The measurement vector  $y$  contains the radiances ( $R$ ) measured by OSIRIS at two wavelengths  $\lambda_a$  and  $\lambda_b$  and for  
315 several view directions  $\theta_i$  represented and is given in Eq.-(9) by ~~and~~ respectively.

$$y = \begin{bmatrix} R_{\lambda_a}(\theta_1) \\ R_{\lambda_b}(\theta_1) \\ \vdots \\ R_{\lambda_a}(\theta_{n_\theta}) \\ R_{\lambda_b}(\theta_{n_\theta}) \end{bmatrix} \quad \text{---(9)}$$

The forward model is based on the adding-doubling approach (De Haan et al., 1987; Van de Hulst, 1963) to solve  
320 the radiative transfer equation and simulate the radiances measured by OSIRIS for the corresponding observation geometries and wavelengths. It is a major element of the retrieval and describes the radiation interaction with the cloud, the surface, and the atmosphere while fixing several parameters (e.g. wind speed, cloud altitude...). We assume a standard atmosphere with a mid-latitude summer McClatchey profile (McClatchey et al., 1972) for the computation of molecular scattering. As ~~all~~ the two channels used in the retrieval are in atmospheric windows (as  
325 seen in Figure 1), the atmospheric absorption is not accounted for. As it is not completely true, the cloud optical thickness will be slightly underestimated and the effective radius slightly overestimated. Our case study is purely above an ocean surface. The reflection by the surface can affect the measured radiances even in cloudy conditions and particularly for ~~the~~ optically thin clouds. The anisotropic surface reflectance of the ocean surface is characterized by a bidirectional polarization distribution function (BPDF). We used the well-known Cox and Munk model to  
330 compute the specular reflection modulated by ocean waves (Cox and Munk, 1954) with a fixed ocean wind speed based on measurements NCEP reanalysis of the National Oceanic and Atmospheric Administration (NOAA).

As in current operational algorithms, the cloud model used for the retrieval is a plane-parallel and homogeneous (PPH) cloud, which implies the independent column pixel approximation (ICPA). The case study is a liquid water cloud scene. Therefore, we used a log-normal distribution of liquid-spherical-for the size of particles, which are  
335 assumed spherical (Hansen and Travis, 1974) and described by an effective radius and an effective variance ( $v_{\text{eff}}$ ). The altitude of the cloud is determined by the measurements of the LIDAR-LNG that was onboard the research aircraft Safire Falcon 20 during the airborne campaign. All simulations are monochromatic computations at the central wavelength of OSIRIS channels. The altitude of OSIRIS and the illumination and observation geometries are calculated based on the coordinates of the aircraft inertial unit.

340 The Jacobian matrix  $K$  includes the partial derivatives of the forward model to each element of the state vector (Eq. (10)). The columns of  $K$  define then the sensitivity of the radiances (each with a specific wavelength - viewing angle

configuration) to COT or  $R_{\text{eff}}$ . The rows of the Jacobian define the sensitivity of each radiance configuration to the two retrieved properties. The Jacobian Matrix is computed using finite differences.

$$K = \begin{bmatrix} \frac{\partial F_{\lambda a}(\theta_1)}{\partial \cot} & \frac{\partial F_{\lambda a}(\theta_1)}{\partial R_{\text{eff}}} \\ \frac{\partial F_{\lambda b}(\theta_1)}{\partial \cot} & \frac{\partial F_{\lambda b}(\theta_1)}{\partial R_{\text{eff}}} \\ \vdots & \vdots \\ \frac{\partial F_{\lambda a}(\theta_{n_y})}{\partial \cot} & \frac{\partial F_{\lambda a}(\theta_{n_y})}{\partial R_{\text{eff}}} \\ \frac{\partial F_{\lambda b}(\theta_{n_y})}{\partial \cot} & \frac{\partial F_{\lambda b}(\theta_{n_y})}{\partial R_{\text{eff}}} \end{bmatrix} \quad (10)$$

### 345 3.3 Error characterization

During the retrieval process, every element is associated with a random or systematic error embedded in the error covariance matrix  $S_e$ . The implantationaccount of errors in the inverse problem adjust allows to have not an unique value for the solution  $x$  the solution from just a unique value of  $t$  but to have a Gaussian probability distribution function (PDF) where  $x$  is the expected value and  $S_x$  is its covariance.

350  $S_x$  is calculated after a successful convergence with Eq. 4 using the Jacobian at the retrieved state and  $S_e$ . This posterior variance-covariance matrix can also be written as follow :

$$S_x = \begin{bmatrix} \sigma_{\cot}^2 & 0 \\ 0 & \sigma_{r_{\text{eff}}}^2 \end{bmatrix} \quad (11)$$

355 It-In this formulation, we have assumed that the two terms of the state vector are independent, thus the off-diagonal terms of  $S_x$  are assumed to be zero. The use of Gaussian PDFs leads to a representation of compute the uncertainty on a particular parameter  $x_k$  defined as the square root of the corresponding diagonal elements of the covariance matrix  $\sigma_k = \sqrt{S_{xkk}}$ , where  $k$  is the index of the parameter in the state vector  $x$  (Eq. 11). We chose to express this uncertainty using the relative standard deviation (RSD) in % (Eq.(12)). The RSD will be used to characterize the quality of the retrieval.

$$RSD = \left( \frac{\sigma_k}{x_k} \right) \times 100 \quad (12)$$

360  $S_e$  regroups represent the sum of the measurement errors ( $S_{\text{mes}}$ ) and forward model- variance-covariance matrix errors. Indeed, the forward model  $F$  uses ancillary information provided by a set of fixed parameters  $b$  (listed in section 3.3.2). Errors related to an uncertain estimation of these fixed parameters are represented by the covariance matrix  $S_{fp}$  described in the next section.

Besides the fixed parameters, the cloud model used in the radiative transfer computation addscan also be a source of uncertainty. The uncertainties of the retrieved parameters related to these approximations are regrouped in the covariance matrix  $S_F$  described in the next section.  $S_\epsilon$  is then addressed as a sum of these three components:

$$S_\epsilon = S_{mes} + S_{fp} + S_F \quad (13)$$

Previous studies (Wang et al., 2016; Iwabuchi et al., 2016; Poulsen et al., 2012; Sourdeval et al., 2015) have already computed and presented the uncertainties of the retrieved cloud properties for all error contributions using  $S_\epsilon$ . Further, Walther and Heidinger (2012) use the optimal estimation framework to separate the contribution of measurement errors and several non retrieved parameters. In our work, a similar framework was used to separate the contribution of each type of uncertainties including also the forward model uncertainties to better quantify and understand the limitation of using simplify forward model in such cloud retrieval algorithm. The contribution of each type of error was not separated. To highlight their magnitude and better understand the sources of errors in cloud retrieval algorithms, we separate the contributions of each type of error. It is realized by propagating the covariance matrices of errors from the measurement space into the retrieved state space (Rodgers, 2000). The gain matrix  $G_y$ , whic represents ing the sensitivity of the retrieved dat quantities to the measurement, is then used:

$$G_y = S_x K^T S_\epsilon^{-1} \quad (14)$$

The total variance-covariance matrix of the retrieved state vector ( $S_x$ ) can then be decomposed into three contributions (Eq. (15), with each term originating from its corresponding error covariance matrix.

$$S_x = S_{x_{mes}} + S_{x_{fp}} + S_{xF} \quad (15)$$

Each term in this equation is developed and discussed in the following three subsections.

### 3.3.1 Uncertainties related to the measurements

Any type of measurement is subject to errors. It is necessary to apply calibration processes to study the relationship between the electrical signals measured by the detectors and the radiances and quantify its uncertainty. Calibration is done during laboratory experiments before the airborne campaign or the instrument launch into space (Hickey and Karoli, 1974) or in-situ if calibration sources are available onboard the sensor (Elsaesser and Kummerow, 2008) or can be vicarious (e.g. Hagolle et al. 1999) by using natural or artificial sites on the surface of the Earth. The uncertainties of the measurements, determined during calibration remaining after the calibration processes are assumed, is usually random, uncorrelated between channels; and can be quantified consistently approximated as a Gaussian probability density function over the measurement space.

As errors between measurements are supposed to be independent, the covariance matrix of measurement noise ( $S_{mes}$ ) is diagonal with dimensions equal to the measurements vector dimension ( $n_y \times n_y$ ). The diagonal elements  $\sigma_{mes_i}^2$  are the square of the standard deviation of measurement errors. In our retrievals, we calculated the covariance matrix based on 5% of measurement errors that cover the measurement errors of OSIRIS:  $\sigma_{mes} = R_{\lambda, \theta} \times 5\%$ .

$$S_{mes} = \begin{bmatrix} \sigma_{mes_1}^2 & 0 & \dots & 0 \\ 0 & \sigma_{mes_2}^2 & \dots & 0 \\ \vdots & \vdots & \ddots & \vdots \\ 0 & 0 & \dots & \sigma_{mes_n}^2 \end{bmatrix} \quad (16)$$

395 The error covariance matrix for the retrieved parameters due to measurement errors is then expressed by mapping the covariance matrix  $S_{mes}$  from the measurements space to the state space by using the gain matrix  $G_y$ :

$$S_{x_{mes}} = G_y S_{mes} G_y^T \quad (17)$$

The uncertainty on a particular parameter  $x_k$  originating from the measurements error is defined as the square root of the corresponding diagonal element corresponding to the standard deviation  $\sigma_{k_{mes}} = \sqrt{S_{x_{mes}kk}}$ . It is expressed using the  
400 RSD (mes) as in Eq. (12).

### 3.3.2 Uncertainties related to the fixed parameters

Any retrievals from remote sensing observations require prior knowledge on several unknown parameters ~~to~~ complete used in the forward model computation. Those parameters are not retrieved due to a lack of sufficient information. To compute the fixed parameters (fp) errors, we quantified the possible error in our estimation of the  
405 fixed model parameters. In our case study, ~~they~~these parameters are the altitude of the cloud (**alt**), the effective variance of the cloud droplet size distribution ( $v_{eff}$ ), and the ocean wind speed (**ws**). These errors are considered to be independent and random under the assumption of linearity of the radiances around the fixed parameters. They are set in the diagonal covariance matrix  $S_{ofp}$ . They are weighed by  $K_{fp}$  the Jacobian matrix containing the gradient of the forward model with respect to the fixed parameters. Finally, as previously, the errors are mapped from the  
410 measurements space to the state vector space through  $G_y$  to estimate their contribution in the retrieval uncertainty as follows:

$$S_{x_{fp}} = G_y S_{fp} G_y^T = G_y K_{fp} S_{ofp} K_{fp}^T G_y^T \quad (18)$$

EveryEach column in  $K_{fp}$  and  $S_{ofp}$  is dedicated to one fixed parameter. Therefore, we can separate the contributions of every element of the fixed parameters vector as follows:

$$415 \quad S_{x_{fp}} = S_{x_{fp,alt}} + S_{x_{fp,ws}} + S_{x_{fp,v_{eff}}} \quad (19)$$

Each covariance matrix from the right side of Eq. (19) is developed as shown in Eq. 20.  $\sigma_{b_i}$  is the standard deviation of the fixed parameter error and  $K_{b_i}$  is a column vector containing the gradient of the forward model in regard of the same fixed parameter  $b_i$ .

$$S_{x_{fp,b_i}} = G_y K_{b_i} \sigma_{b_i}^2 K_{b_i}^T G_y^T \quad (20)$$

420 In order to develop  $S_{x_{fp,b_i}}$  for each element of  $b$ , the forward model has been constructed in a flexible way that permits to initiate small variations of any fixed parameter and then calculate the partial derivatives of the forward model in regard to the ancillary data, called the Jacobians of the fixed parameters  $K_{alt}$ ,  $K_{v_{eff}}$ , and  $K_{ws}$ .

The last elements needed to resolve in Eq. (20) are the error or standard deviations of the cloud altitude, the effective variance of water droplets and the ocean wind speed,  $\sigma_{alt}$ ,  $\sigma_{v_{eff}}$  and  $\sigma_{ws}$  respectively.

425 The values and the uncertainties of these fixed parameters are chosen according to the experiment setup of the campaign.

To estimate the uncertainties originating from the fixed cloud altitude, we used the opportunity of having the LIDAR-LNG on aboard the aircraft, which gives the backscattering ~~altitudes of the LIDAR-LNG~~ signal obtained around the case study of CALIOSIRIS, ~~from 11:01:06 to 11:03:06 (time where the same cloud scene is apparent),~~  
430 ~~the cloud altitude~~ varies between 5.57 and 5.73 km in our cloud scene. For practical reasons related to the radiative transfer code, we use a value of 6km for the cloud top altitude and a standard deviation of  $\sigma_{alt}=0.16$  km (3% of the cloud altitude). This value is low thanks to the knowledge provided by the Lidar. ~~is then retained for the cloud altitude.~~

Concerning the effective variance  $v_{eff}$ , ~~for~~ to which the polarized radiance is highly sensitive in the supernumerary arcs near the cloud bow (Bréon and Goloub, 1998), we fixed a value of 0.02 based on the ~~position of the cloud bows and number of~~ supernumerary ~~arcs~~ bows in the polarized radiances (not shown). After simulating radiances with several values of  $v_{eff}$ , we choose to add a ~~σ~~  $\sigma_{v_{eff}}=0.003$  (15%) possible error in the estimation of this parameter. As the value of  $v_{eff}$  was fixed using the polarization measurements of OSIRIS, this uncertainty is weak and not representative of all situations.

440 For the ocean wind speed fixed to 8 m/s obtained from the database of the National Oceanic and Atmospheric Administration, we used an error  $\sigma_{ws}=0.8$  m/s (10%). It covers the possible sources of error in the surface wind speed retrievals.

### 3.3.3 Uncertainties related to the forward model

Forward models are usually formulated around some limitations and assumptions that can contribute to the  
445 uncertainty on the retrieved parameters. The forward model used to simulate the radiances measured by OSIRIS follows the cloud plane parallel assumption. This assumption is known to cause errors on the retrieved parameters (see section 1) that can be assessed and included in the total uncertainty. The evaluation of these modeling errors requires an alternative forward model  $F'$  that includes more realistic physics. The contribution of this error is represented by the following equation:

$$450 \quad S_{x_F} = G_y S_F G_y^T \quad (21)$$

$S_F$  is diagonal with dimensions equals to the measurements vector dimension ( $n_y \times n_y$ ). Each diagonal element is the square of the difference between radiance computed for a specific direction with the simplified forward model  $F$  and the one computed with the more realistic forward model  $F'$  while maintaining the same state vector and the fixed parameters vector  $b$ :  $(F(x, b) - F'(x, b)) \cdot (F(x, b) - F'(x, b))^T$ .

455 The simplified model used for the retrieval can lead to biased retrieved parameters. In this case, the bias due to the model will be included in the Gaussian PDF width, resulting in an overestimation of the uncertainties.

The uncertainties related to the cloud vertical homogeneity and the cloud horizontal homogeneity are quantified separately. In the following, we present the elements of the forward model used to quantify the uncertainties of these assumptions.

460

#### *Non-uniform cloud vertical profile model*

The vertically heterogeneous cloud model to assess the uncertainties of the assumed homogeneous cloud model is described by:

465 - an effective radius profile and possibly an effective variance profile but for simplification, we will consider that  $v_{\text{eff}}$  is constant over the entire vertical profile with a value of 0.02.

- an extinction coefficient ( $\sigma_{\text{ext}}$ ) profile

- a cloud geometrical thickness (CGT) characterized by the difference between the altitude of the cloud top ( $z_{\text{top}}$ ) and the cloud base ( $z_{\text{bot}}$ ). The values of CGT,  $z_{\text{top}}$  and  $z_{\text{bot}}$  are fixed based on the LIDAR measurements.

470 The effective radius and extinction coefficient profiles are computed using an analytical model already presented/introduced in (Merlin, 2016). It is based on adiabatic cloud profiles, which are described and used in several studies (Chang, 2002; Kokhanovsky and Rozanov, 2012). In the adiabatic scheme, the effective radius increases with altitude. However, several studies proved that a simple adiabatic profile is not sufficient to describe a realistic cloud profile (Platnick, 2000; Seethala and Horváth, 2010; Nakajima et al., 2010; Miller et al., 2016). because Depending on the maturity of the cloud, turbulent and evaporation processes can reduce the size of droplets at the top of the cloud and/or collision and coalescence process can increase the size of the droplets in the lower part of the clouds as observed by Doppler Radar (Kollias et al., 2011). The profile used in this study aims to represent the case of droplet size reduction at the top of the cloud but other and more sophisticated and representative profiles can be used (Saito et al., 2019).

475  
480 The description of this more realistic vertical cloud profile is obtained with two adiabatic profiles (Figure 3) that are joined at the altitude of maximum LWC (called  $z_{\text{max}}$ ):

- The first profile from  $z_{\text{bot}}$  to  $z_{\text{max}}$  is considered adiabatic.

- The second profile from  $z_{\text{max}}$  to  $z_{\text{top}}$  follows an adiabatic LWC profile decreasing with altitude.



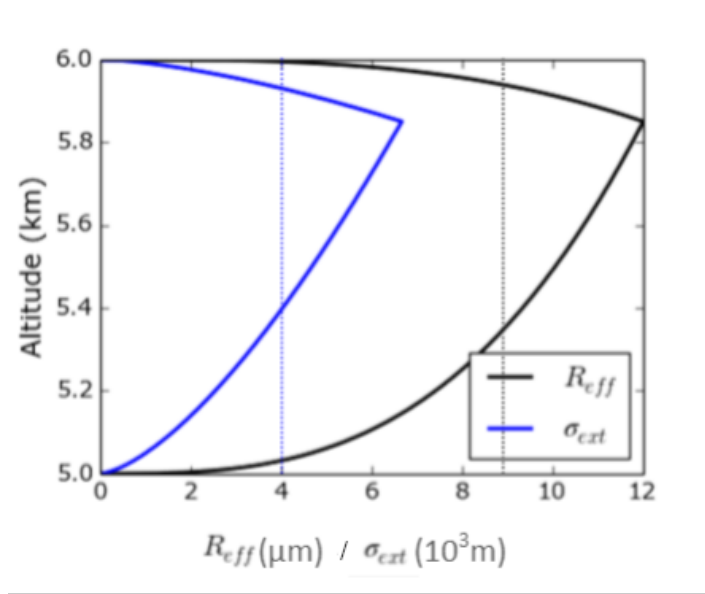

**Figure 3: The heterogeneous vertical profile of effective radius (black line) and extinction coefficient (blue line) used to assess uncertainties due to the assumption used for the vertical profile. The equivalent homogeneous vertical profiles are shown in dashed lines. The cloud is between 5 and 6 km. The maximum extinction coefficient and effective radius are  $6.6 \text{ km}^{-1}$  and  $12 \text{ }\mu\text{m}$  respectively and the altitude  $z_{\text{max}}$  is  $5.85 \text{ km}$**

Considering that LWC is equal to zero at the base and top of the cloud, and relying on the linear variation model of the LWC with altitude ( $z$ ) established in (Platnick, 2000), we can write that:

$$LWC(z) = LWC_{\text{max}} \frac{z - z_{\text{bot}}}{z_{\text{max}} - z_{\text{bot}}}; z \in [z_{\text{bot}}, z_{\text{max}}] \quad (22)$$

$$LWC(z) = LWC_{\text{max}} \frac{z_{\text{top}} - z}{z_{\text{top}} - z_{\text{max}}}; z \in [z_{\text{max}}, z_{\text{top}}]$$

485 The profiles of effective radius (Eq. (23)) and extinction coefficient (Eq. (24)) can then be computed by considering that the particle concentration is constant over the entire cloud which makes it possible to obtain analytical functions of LWC,  $R_{\text{eff}}$  and  $\sigma_{\text{ext}}$ .

$$R_{\text{eff}}(z) = R_{\text{eff}_{\text{max}}} \left( \frac{z - z_{\text{bot}}}{z_{\text{max}} - z_{\text{bot}}} \right)^{\frac{1}{3}}; z \in [z_{\text{bot}}, z_{\text{max}}] \quad (23)$$

$$R_{\text{eff}}(z) = R_{\text{eff}_{\text{max}}} \left( \frac{z_{\text{top}} - z}{z_{\text{top}} - z_{\text{max}}} \right)^{\frac{1}{3}}; z \in [z_{\text{max}}, z_{\text{top}}]$$

$$\sigma_{\text{ext}}(z) = \sigma_{\text{ext}_{\text{max}}} \left( \frac{z - z_{\text{bot}}}{z_{\text{max}} - z_{\text{bot}}} \right)^{\frac{2}{3}}; z \in [z_{\text{bot}}, z_{\text{max}}] \quad (24)$$

$$\sigma_{\text{ext}}(z) = \sigma_{\text{ext}_{\text{max}}} \left( \frac{z_{\text{top}} - z}{z_{\text{top}} - z_{\text{max}}} \right)^{\frac{2}{3}}; z \in [z_{\text{max}}, z_{\text{top}}]$$

A form factor  $p$  (Eq. (25)) allows the adjustment of the altitude  $z_{max}$  where the extinction coefficient and the effective radius are the largest:

$$p = \frac{z_{top} - z_{max}}{z_{top} - z_{bot}} \quad (25)$$

This unitless parameter  $p$  varies from 0 to 1 representing the shape of the profile. The value 0 corresponds to  $z_{max} = z_{top}$  (adiabatic cloud) and the value 1 corresponds to  $z_{max} = z_{bot}$  (a reverse adiabatic cloud with a negative gradient of water content). In the following results, a value of 0.15 is assigned [to this parameter](#) which allows to have a profile close to the one studied in (Miller et al., 2016) from large-eddy simulations (LES) cloud scenes.

To assess the error due to the vertical heterogeneity of the cloud, we need to specify the maximum value of the extinction coefficient  $\sigma_{ext_{max}}$  and the effective radius  $R_{eff_{max}}$  of the vertically heterogeneous cloud, corresponding to the “equivalent” homogeneous clouds. [Several options are possible for these values.](#) We [choose to](#) use Eq. (26) to assign  $\sigma_{ext_{max}}$  which leads to the same integrated extinction profile and Eq. (27) to assign  $R_{eff_{max}}$  to [what ensures](#) that the mean  $R_{eff}$  of the heterogeneous vertical profile is equal to the  $R_{eff}$  of the homogeneous cloud ( $R_{eff_F}$ ).  $\sigma_{ext_{max}}$  and  $R_{eff_{max}}$  are found analytically by integrating the profiles described in Eq. (23) and Eq. (24).

$$\sigma_{ext_{max}} = \frac{5}{3} CO T_F / (z_{top} - z_{bot}) \quad (26)$$

$$R_{eff_{max}} = \frac{4}{3} R_{eff_F} \quad (27)$$

A vertically heterogeneous cloud is computed for each pixel using the retrieved value based on the homogeneous assumption. The error-covariance matrix describing the error due to the simple homogeneous cloud assumption (Eq. (21)) is calculated from the difference between radiances computed with homogeneous and heterogeneous vertical profiles, denoted  $F$  and  $F'$  respectively.

### 510 *The 3D radiative transfer model*

The other assumption that might affect the retrieved cloud optical properties in the current operational algorithms is the horizontally plane-parallel and homogeneous (PPH) assumption for each observed pixel. It implies that each pixel is horizontally homogeneous and independent of the neighboring pixels (known as the independent pixel [column approximation \(ICPA\)](#)).—The homogeneous [IPAPPH](#) assumption affects the cloud-top radiances and leads to differences between 1D and 3D radiances that are the result of several effects discussed in numerous publications and briefly summarized in section 1. [This PPH assumption includes errors known as the PPH bias due to the subpixel variations of the cloud and errors related to the photon horizontal transport between columns \(IPA error\).](#) [At the high spatial resolution of OSIRIS \(less than 50 m\), it was shown from airborne data that the dominating effect is related to](#)

the IPA error (Zinner et Mayer, 2006). In the following, we consider thus only this error and assume that the pixel is homogeneous at the measurement scale.

To assess the uncertainties in the retrievals arisen from this assumption, Eq. (21) is used.  $S_F$  is then the difference between the radiances computed with a 1D radiative transfer code (1D-RT), following the Adding-doubling ~~sehememethod~~ (Hansen and Travis, 1974), and the radiances computed with a 3D radiative transfer (3D-RT) code called 3DMCPOL (Cornet et al., 2010). The 3D simulations used, for each pixel, the COT and  $R_{\text{eff}}$  retrieved using the PPH assumption. Errors on cloud model assumptions are assessed independently so a vertical homogeneous profiles ~~areis~~ assumed. We also assume a flat cloud top, differences, and errors are thus ~~minimizedunderestimated~~ as cloud top variation may increase the differences between 3D and 1D radiances (Várnai and Davies, 1999; Várnai, 2000). The differences are thus mainly due to the lateral photon transport which tends to smooth the radiances fields compared to their 1D counterpart (Davis et al. 1997) and to the cloud heterogeneity along the line of sight (e.g. Fauchez et al., 2018).

#### 4 Retrieval and uncertainty estimation for a liquid cloud case study measured by OSIRIS

Our strategy to assess the different types of uncertainty follows two steps. In a first step, we retrieve COT and  $R_{\text{eff}}$  using a bispectral multi-angular method by considering the uncertainties related to the measurement errors alone. We use a weakly absorbing channel centered at 1240 nm that is mainly sensitive to COT, and a ~~channel~~ partially absorbing ~~channel by the water droplets~~ centered at 2200 nm, and thus sensitive ~~on to~~  $R_{\text{eff}}$ . In this case study, up to 13 viewing angles are available for each pixel. In the first step, only the measurement errors are accounted for and included in  $S_e$ . This error is ~~straightforward and~~ usually well characterized ~~butand~~ does not change once the measurements are realized. Not considering the other errors at this stage allows benefiting from a faster retrieval algorithm without the calculation of  $K_b$  and the heavy computation cost of heterogeneous cloud profiles and 3D-RT calculations. The second step consists of computing the errors ~~due~~ the non retrieved parameters and due to the assumption of a vertically and horizontally ~~inhomogeneous cloud fromfor~~ the retrieved ~~of~~  $R_{\text{eff}}$  and COT.

The parameters retrieved in the first step may be biased, in particular due to the use of a simplified cloud model to connect the state vector to the measurements. The estimation of the uncertainties performed in the second step assumes that the variations predicted by the simplified and the realistic models around the retrieved values (potentially biased) and around the true values are identical. This is correct with a linear forward model but can be a too strong assumption in cloud retrieval regarding the non linearity of the relationship of the radiances in function of cloud parameters. A way to test this assumption would be to use numerical experiments.

In Figure 4, COT (a) and  $R_{\text{eff}}$  (b) retrieved from multi-angular SWIR radiances are presented. Spatial variations are mainly due to variations in the observed cloud structures. The COT range is between 0.5 and 6 with a mean value of 2.1. Some values of COT are very small but no clear sky pixel is present. while  $R_{\text{eff}}$  varies between 2 and 24  $\mu\text{m}$  around a mean value of 8.8  $\mu\text{m}$ . Figure 4c presents the normalized cost function, which is less or equal to one when the retrieval successfully converges according to Eq. 6 (convergence of Type 1). In case of multi-angular

measurements, the normalized cost function is often above one meaning that the simulated radiances do not fit the measurements while considering the measurements error covariance only. This comes from the attempt to fit the measured radiances from all the available viewing directions with a too simple forward model far from reality. The retrieval stops thus mainly according to Eq. 7 (convergence of Type 2) indicating that the state vector remains almost constant between two successive iterations. When neither Eq. 6 or Eq. 7 are achieved the retrieval fails. For the whole scene, failed retrievals account for 3.3% of the pixels. The failure may be associated with pairs of radiances outside the LUT that can occur for several reasons well documented in Cho et al. (2015).

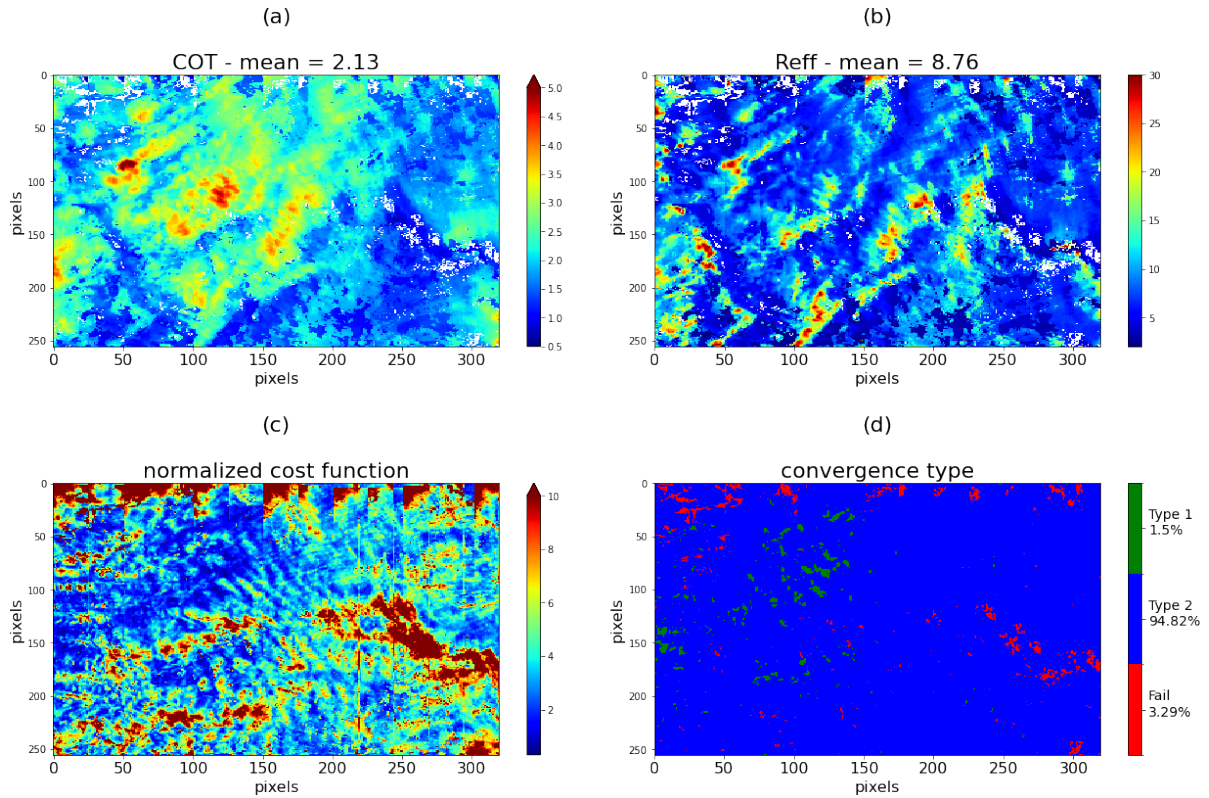

**Figure 4:** COT (a) and  $R_{\text{eff}}$  (b) retrieved using multi-angular bispectral method from a liquid cloud case observed during the CALIOSIRIS airborne campaign on 30 June 24 October 2014 at 11:02 (local time). Pixels associated to failed retrievals are represented by white pixels. (c) Normalized cost function. (d) Convergence type (Eq. 6 for Type 1 and Eq. 7 for Type 2) and failed retrieval.

560 As detailed in section 3.3, the final error is divided into three categories. Figure 5 shows the uncertainties originating from a 5% measurement error on the retrieved COT, RSD COT (mes) and  $R_{\text{eff}}$ , RSD  $R_{\text{eff}}$  (mes). RSD COT (mes) ranges from 0.5 to 5% with a mean value of 3.2% while RSD  $R_{\text{eff}}$  (mes) ranges from 2 to 12% with a mean value equal to 6.32%. These uncertainties are plotted according to their respective values in panels (c) and (d). Both cloud properties have relative uncertainties RSD COT (mes) that increases with the magnitude of the retrieved COT values, as RSD  $R_{\text{eff}}$  (mes) with  $R_{\text{eff}}$  for values until  $15 \mu\text{m}$ . The uncertainties due to measurement errors are low, especially for optical thickness (less than 5%). This is related to the quasi-linearity and the steep slope of the radiance as a function of COT and  $R_{\text{eff}}$  in this cloud regime (small COT). When the radiance-COT (or  $R_{\text{eff}}$ ) relationship is quasi-linear, the sensitivity of the forward model to COT (or  $R_{\text{eff}}$ ) is high, which will consequently lead to parameters

retrieved with a high accuracy (low RSD). As When COT (or  $R_{\text{eff}}$ ) increases, the gradient of the radiance-COT (or  $R_{\text{eff}}$ ) relationship decreases causing larger uncertainties.

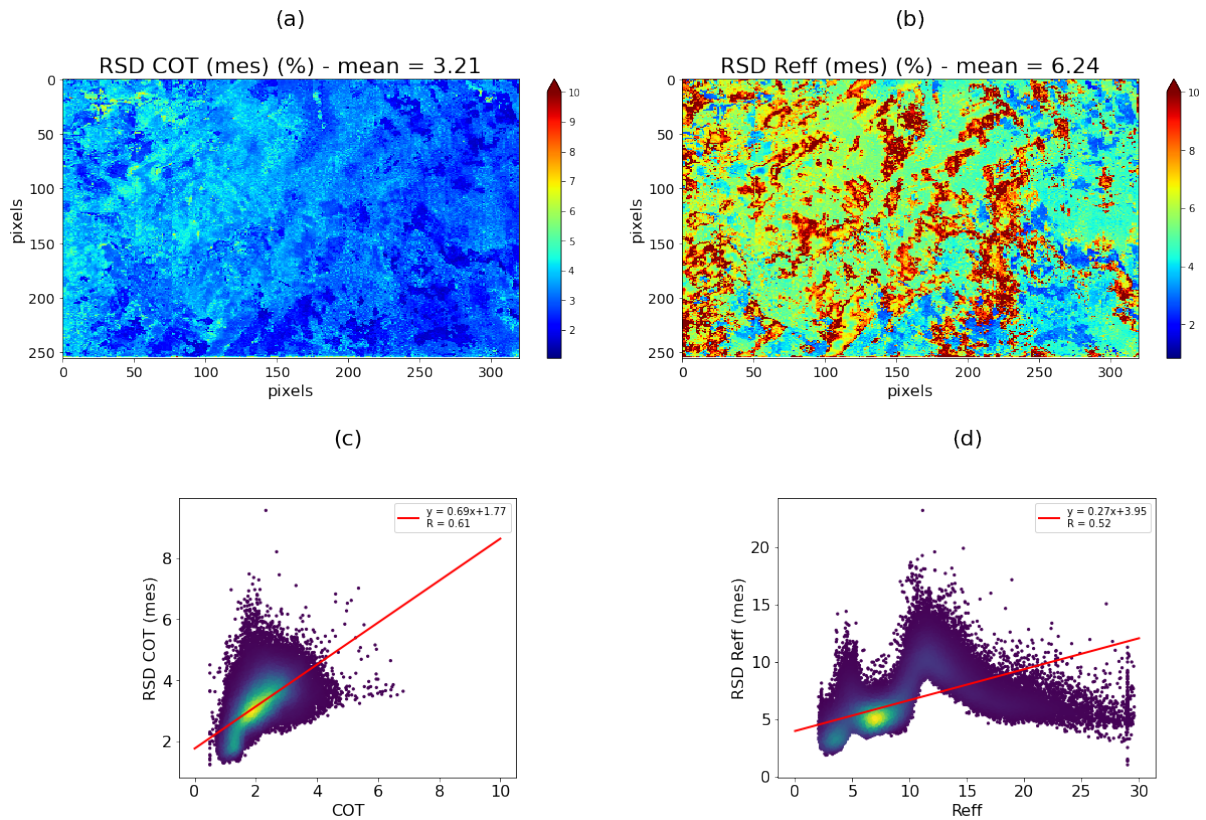

**Figure 5: Uncertainties (RSD (%)) of COT (a) and  $R_{\text{eff}}$  (b) originating from the measurement errors for the case study of CALIOSIRIS. COT uncertainties in function of COT (c) . Reff uncertainties in function of Reff (d).**

The second type of uncertainty is related to the fixed parameters in the forward model. In Figure 6, we show the uncertainty on COT and  $R_{\text{eff}}$  in % due to an incorrect estimation of each fixed parameter in the forward model. Panels (a) and (b) represent the uncertainties originating from the fixed cloud altitude, RSD COT (alt) and RSD  $R_{\text{eff}}$  (alt) respectively. Both show null values of very small uncertainties with values close to zero. In fact, in the visible range, the altitude of the cloud mainly determined the amount of Rayleigh scattering that occurs above the cloud. This type of scattering is dominant at shorter and visible wavelengths and becomes negligible at the studied wavelengths (1240 and 2200 nm). Consequently, at these wavelengths, an error in the fixed cloud altitude does not contribute to the uncertainty on the retrieved COT and  $R_{\text{eff}}$ .

The (c) and (d) panels in Figure 6 represent the uncertainties of the retrieved COT and  $R_{\text{eff}}$  originating from the fixed effective variance of droplets the particle size distribution. They are nearly null on COT with a mean value of 0.05% as the 15% uncertainty on the value of  $v_{\text{eff}}$  (0.02) does not modify the total radiances. On the other hand, RSD  $R_{\text{eff}}$  ( $v_{\text{eff}}$ ) reaches 0.5% with a mean value of 0.25%. Indeed,  $v_{\text{eff}}$  modifies the width of the cloud droplet distribution and consequently slightly the absorption by cloud droplets, resulting in a larger error which gives information to

585 retrieve  $R_{\text{eff}}$ . For  $R_{\text{eff}}$  higher than  $15 \mu\text{m}$ , the relationship between SWIR radiances and  $R_{\text{eff}}$  tends to flatten which make  
them less sensitive to  $\nu_{\text{eff}}$  and thus the uncertainties are smaller than 0.1%. We remind that we fixed the value of  $\nu_{\text{eff}}$   
using multi-angular polarized measurements of OSIRIS, which leads to choose a weak uncertainty of  $\nu_{\text{eff}}$  (15%).  
However, if no information on  $\nu_{\text{eff}}$  is available in the measurements, the uncertainty should be higher and thus the  
errors due to the non-retrieved effective variance. Platnick et al. (2017) obtain 2% and 4% uncertainty for COT and  
590  $R_{\text{eff}}$  respectively for  $\nu_{\text{eff}}$  between 0.05 and 0.2.

The panels (e) and (f) in Figure 6 shows that an error in the estimation of the ocean wind speed affects the retrieved  
COT and  $R_{\text{eff}}$  mainly for small COT. The water-air interface is reflecting mainly in the specular direction~~of specular~~  
~~reflection~~, but the ocean ~~is being~~ not perfectly smooth,; the bright surface, named glitter, ~~is modulated~~ enlarged  
the waves, that enlarge the directions of reflection due to the specular reflection. These waves are mainly formed by  
595 the wind. The higher the surface wind speed is, the greater the amplitude of the waves is leading to a larger reflection  
angle (wider sun-glint). The Sun-glint reflection is seen by OSIRIS only for very small values of COT and implies  
uncertainties of fn the retrieved parameters of about 0.5%. In case of broken clouds, the errors resulting from the ocean  
wind speed uncertainties would be larger. At higher COT, the surface is non-apparent to OSIRIS measurements, and  
uncertainties are thus close to zero.

600 We note that all the uncertainties of the studied fixed parameters remain below 1%, which shows that retrieval of all  
the COT- $R_{\text{eff}}$  couples does not have a high dependence on the fixed forward model parameters.

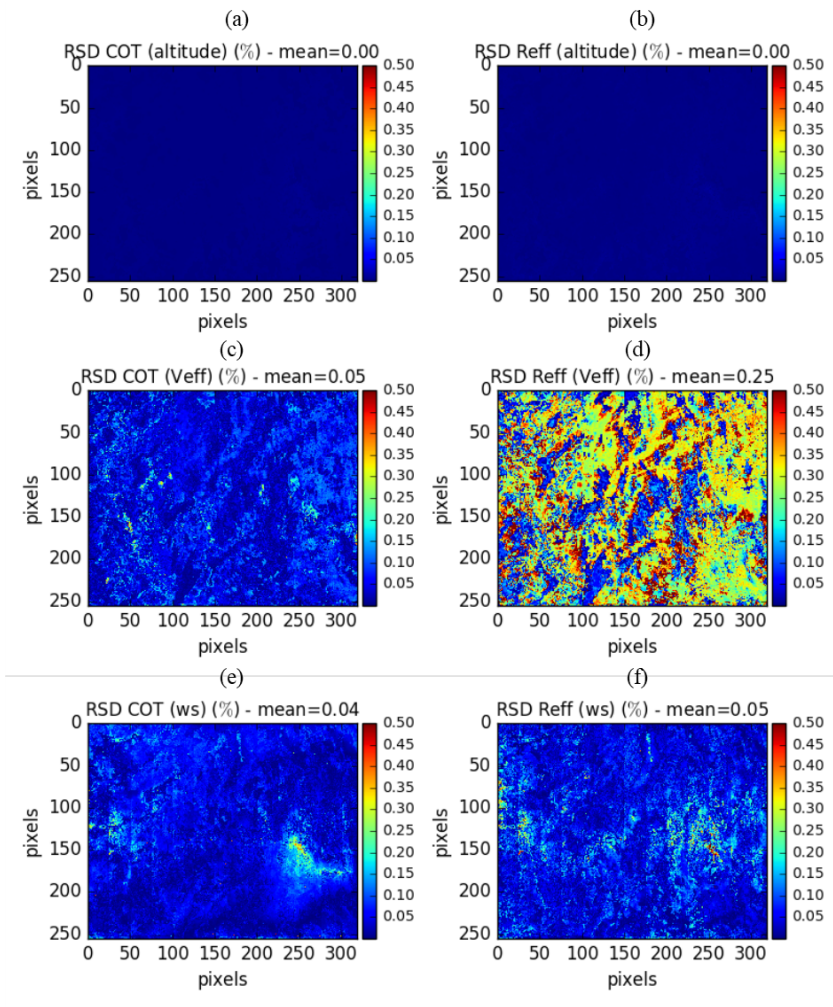

**Figure 6: The uncertainties (RSD (%)) of  $\tau_{\text{COT}}$  (left column) and  $R_{\text{eff}}$  (right column) originating from the ancillary non-retrieved parameter errors: altitude (a and b), the effective variance of water droplet distribution (c and d), and the surface wind speed (e and f).**

The uncertainties due to the assumptions of the forward model are presented in Figure 7. The panels (a) and (b) represent the uncertainties of  $\tau_{\text{COT}}$  and  $R_{\text{eff}}$  respectively, originating from the vertically homogeneous assumption. RSD COT (Fpv) ranges between 1 and 8% with a mean value of 4.9% while RSD  $R_{\text{eff}}$  (Fpv) varies from 2 to 20% with a mean value of 13.3%. We note that when the cloud is optically thin, RSD COT (Fpv) and RSD  $R_{\text{eff}}$  (Fpv) tend to be lower. When the extinction is small, the radiations penetrate deeper into the cloud and bring information on the whole cloud, similar to the one obtained with the homogenous vertical profile. The differences between radiances issued coming from the vertical heterogeneous and homogeneous profiles are small since the integrated extinction over the cloud is approximately the same in both cases. For larger COT, the radiations penetrate less in the cloud and are only affected by the upper part of the cloud where the extinction coefficient is different from one profile to another. In this case, RSD COT (Fpv) and RSD  $R_{\text{eff}}$  (Fpv) are larger up to 8% and 20% respectively.

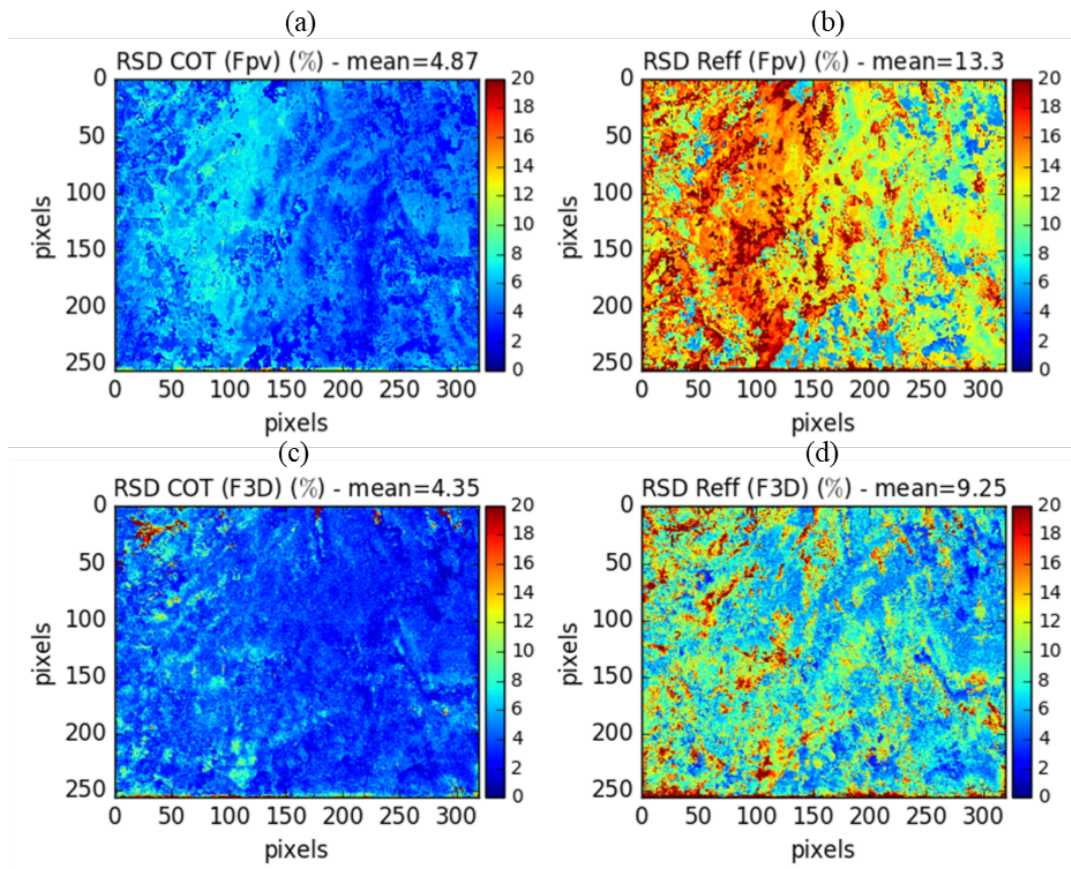

**Figure 7: The uncertainties (%) on COT and  $R_{\text{eff}}$  originating from the assumptions in the forward model; for when not considering the heterogeneous vertical profile (a and b) and the 3D radiative behavior of radiation transfer (c and d).**

The uncertainties originating from the use of a 1D radiative transfer code instead of a more realistic 3D radiative transfer are represented in Figure 7 (c) and (d) for COT and  $R_{\text{eff}}$  respectively. RSD COT (F3D) ranges between 1 and 20% with a mean value of 4.35%, while RSD  $R_{\text{eff}}$  (F3D) varies from 2 to 18% with a mean value of 9.25%. We remind here that, given the high spatial resolution of OSIRIS measurements, we consider the PPH bias as negligible and do not account for the sub-pixel variability of cloud properties in the 3D radiative transfer simulation. At high spatial resolution, these differences can be caused by several effects that can add or oppose each other.

Considering the solar zenith incidence angle ( $59^\circ$ ), illumination and shadowing effects can also be present depending on the viewing geometries and roughness of the radiative fields (Várnai, 2000). (Marshak et al., 1995). However, in this work, we are dealing with flat cloud tops that induce weaker 3D effects than bumpy cloud tops (Várnai et Davies, 1999). In addition, with multi-angular measurements, where the same cloudy pixel is viewed under different viewing angles, which may tend to mitigate the influence of illumination and shadowing effects. Therefore, contrary to MODIS mono-angular retrieval (Várnai and Marshak, 2002) and because the cloud top is flat, 3D effects due to solar illumination do not appear in the retrieved cloud properties.



The plane-parallel and homogenous (PPH) approximation (Cahalan et al., 1994) strongly depends on the sensor spatial resolution (Oreopoulos and Davies, 1998). The high spatial resolution of OSIRIS (around 50 m) makes the sub-pixel cloud variabilities can be fairly well represented leading to a low PPH bias. At this scale, the effects related to the Independent Pixel Approximation (IPA) (Oreopoulos and Davies, 1998) are dominant since the horizontal transfers of photons between pixels are important. The smaller these columns horizontal sizes are considered in the simulations, the more the real behavior of radiation in the atmosphere will be misrepresented. The horizontal radiation transport (HRT) tends to smooth the radiative field by increasing or decreasing the radiances according to the optical thickness gradient between the considered pixel and its neighbors. This effect is shown in Figure 8. The panels (b) and (d) representing the radiances reflectances computed with 3DMCPOL at 1240 and 2200 nm respectively show the smoothest field compared to the radiances reflectances computed with a 1D radiative transfer model in panels (a) and (c). The variabilities in the 3D radiative field are indeed less pronounced compared to the 1D field.

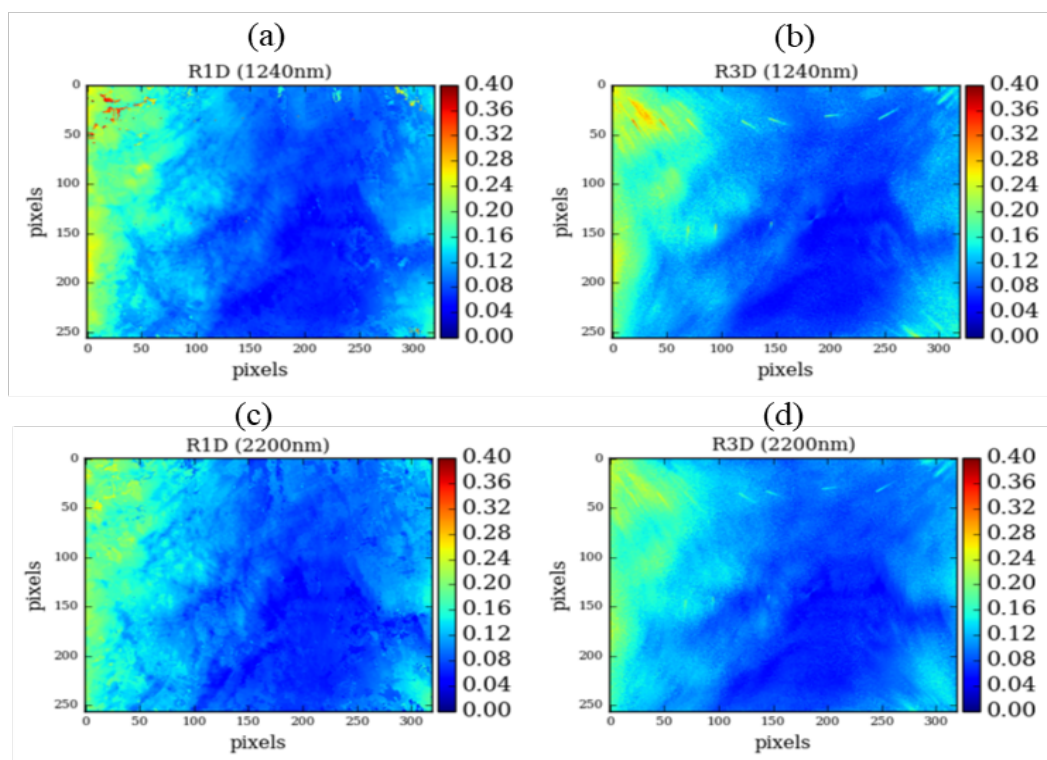

**Figure 8: The simulated 1D (a) and 3D (b) radiances reflectances at 1240 nm using the retrieved COT and  $R_{\text{eff}}$  presented in Figure 4 for the central image. (c) and (d) are the same as (a) and (b) but for 2200 nm.**

In Figure 9, the histograms of the relative difference between the radiances computed in 1D (R1D) and the radiances computed in 3D (R3D) at 1240 nm for different bins of optical thickness are plotted. We can see the shift of the histograms from negative value for small optical thickness (R1D < R3D) towards positive difference for larger optical thickness (R1D > R3D) that is explained by the horizontal radiation transport between columns.

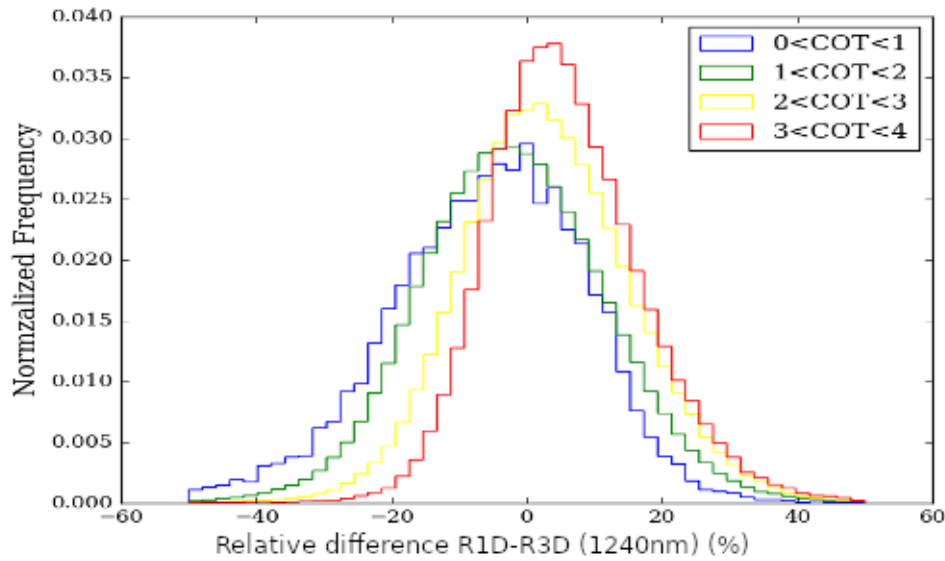

**Figure 9: Histograms of the relative difference between the radiances/reflectances computed in 1D and 3D at 1240 nm for the central image. Each histogram corresponds to a domain of COT.**

645

Overall, we note that the uncertainties due to the forward model assumption are much more important than the one due to the fixed parameters. The forward model/retrieval is not sensitive to small variations in the fixed parameters. However, while assessing uncertainties due to the vertical profile or radiative transfer assumption, we change the parameters that our forward model is proven to depend on, thus minor changes in the integrated profile can lead to relatively large variations in the radiance fields, and consequently large uncertainties.

650

### 5 Advantage of using multi-angular versus mono angular information

The same strategy applied in section 4 is applied using the bispectral mono-angular method used for the MODIS instrument for example. Using the mono-angular bispectral MODIS-like approach, the measurement vector  $y$  for each pixel contains two mono-angular total radiances, one at 1240 nm and the other at 2200 nm corresponding to the direction in the central image of the multi-angular sequence to retrieve COT and  $R_{\text{eff}}$ .

655

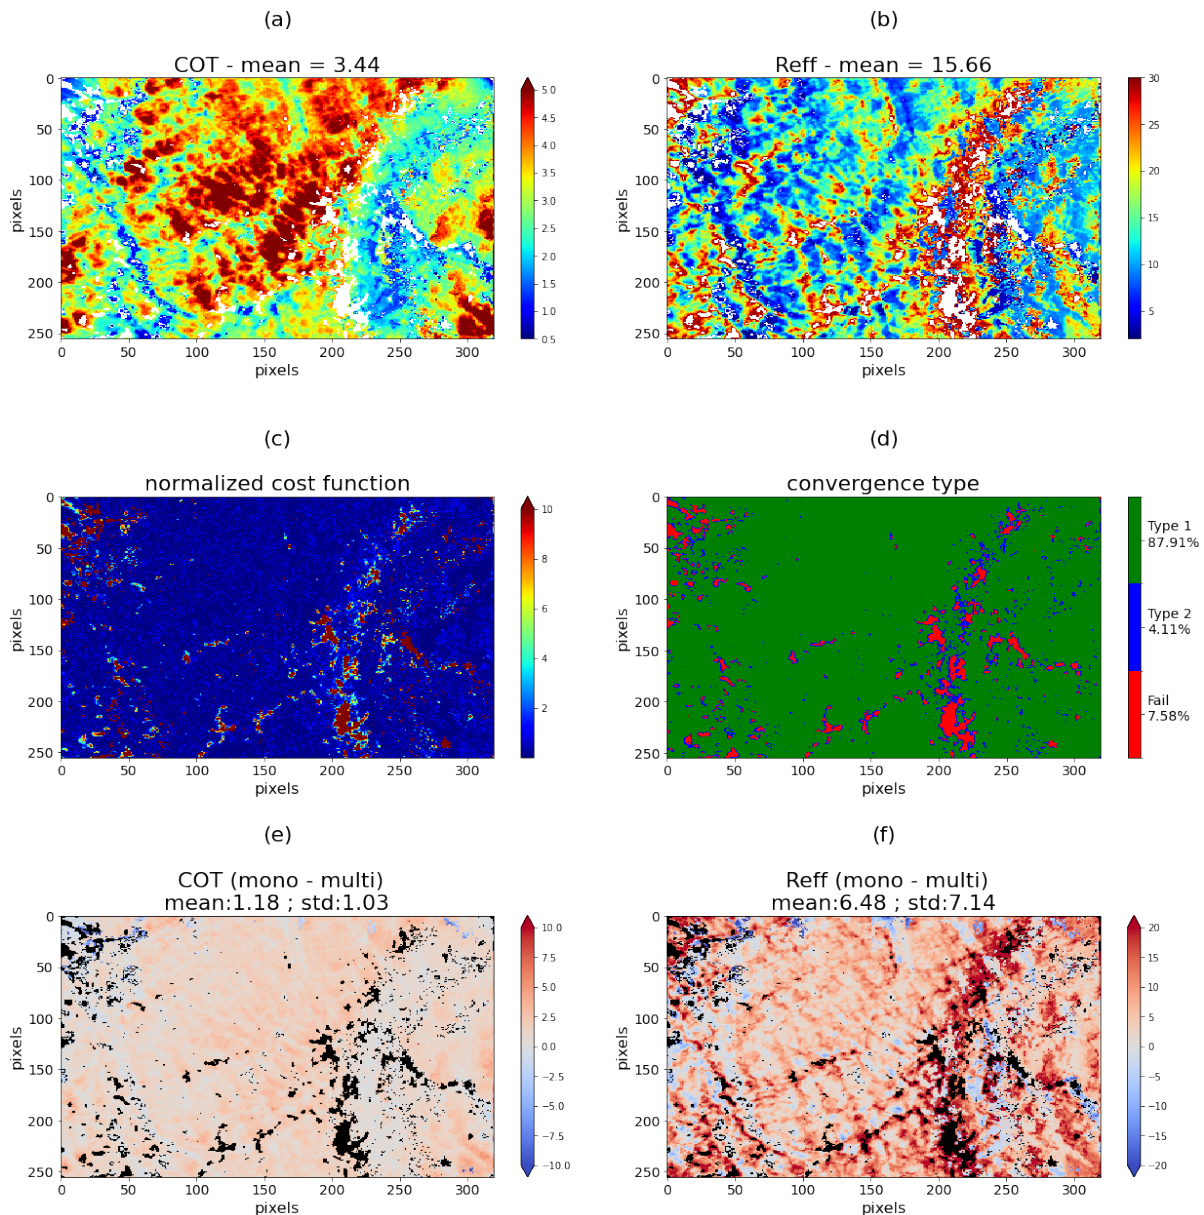

**Figure 10: COT (a) and  $R_{\text{eff}}$  (b) retrieved using mono-angular bispectral method for the CALIOSIRIS liquid cloud case study on 30 June 2014 at 11:02 (local time). Pixels associated to failed retrievals are represented by white pixels. (c) Normalized cost function. Convergence type (Eq. 6 for Type 1 and Eq. 7 for Type 2) and failed retrieval (d). Differences between mono-angular and multi-angular retrieval for retrieved optical thickness (e) and for retrieved effective radius (f).**

The results are presented in Figure 10. The retrieved COT over the whole field varies between 1 and 12 with a mean value equals to 3.44. Comparing to multi-angular measurements (mean COT of 2.13), the retrieved COT values tend to be higher. The range of retrieved  $R_{\text{eff}}$  has a mean value of 15.65  $\mu\text{m}$ , compared to 8.76  $\mu\text{m}$  for multi-angular retrieval. Mono-angular retrieval is particularly affected by the high value of  $R_{\text{eff}}$  retrieved around the scattering angles 130-140° where the sensitivity of 2200 nm radiances to the water droplet size is known to be small. This area corresponds also to a more important number of failed retrievals. As a matter of fact, (Cho et al., 2015) show have indeed shown that in liquid marine cloud cases, the phase functions of different  $R_{\text{eff}}$  converge to the same value for

670 these scattering angle range leading to the failure of water droplets size retrieval from MODIS measurements. This reduced sensitivity explains also the high uncertainty on  $R_{\text{eff}}$  due to measurement errors around the cloud bow (Figure 11). The ~~reduced~~smaller sensitivity on  $R_{\text{eff}}$ , in this case, is not limited to the cloud bow directions and supernumerary bows but is also visible at some regions of small scattering angles (70-80°) that can be affected by specular reflection over the ocean.

675

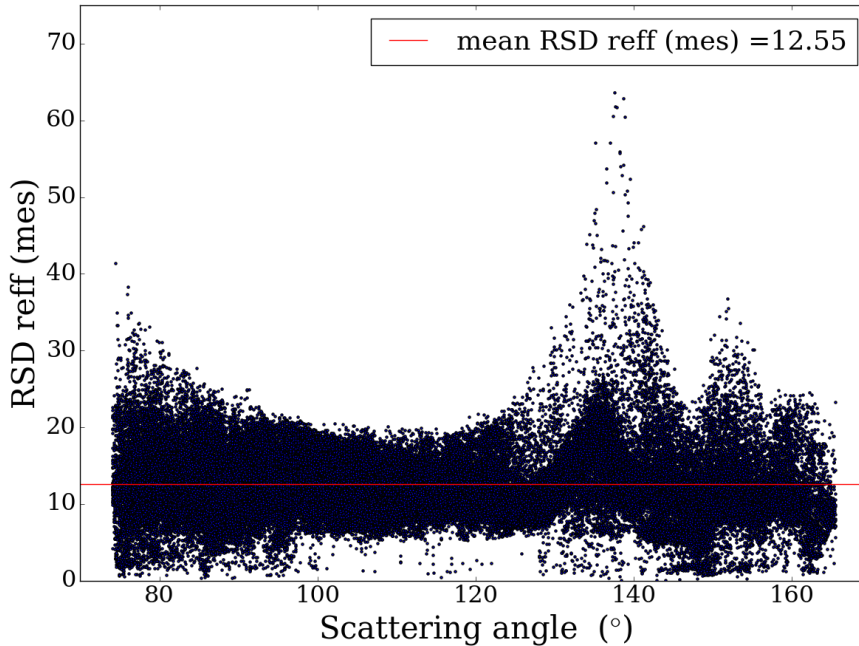

**Figure 11: Uncertainty on the effective radius originating from the measurement error,  $RSD R_{\text{eff}} (mes)$  as a function of the scattering angle for the mono-angular retrieval. The red line represents the mean  $RSD R_{\text{eff}} (mes) = 12.55\%$ .**

680 Multi-angular retrieval presents the major advantage, that no aberrant values of  $R_{\text{eff}}$  are retrieved near the scattering angles at 140° (comparing Figure 4b to Figure 10b). Clearly, the multi-angular measurements contain more information and allow to resolve the problem encountered with the MODIS-like mono-angular bispectral method which is also clear in the reduction of the failed convergences from 5.97.6% to 2.43.3% (not shown here). In the overall scene, smaller  $R_{\text{eff}}$  values (and consequently lower COT values) are obtained. A smallest effective radius leads to increase the backward scattering and so the reflected radiance, which results in a lower retrieved optical thickness.

685 Excepted in case of failed retrievals that occur for values outside the LUT ranges, ~~the~~ relation between radiances and COT/ $R_{\text{eff}}$  being monotonical, ~~the~~ mono-directional method always allows us to always find a retrieved values as it is always possible to find a cloud model (that is a pair of COT and  $R_{\text{eff}}$ ) that matches a single the measured radiances of a given target. However, this value can be more or less far from the real value, and A normalized cost function value (Figure 10c) less or equal to one is not necessarily an indication of an accurate retrieval, but only that a fit occurred. On the other hand, multi-angular retrieval makes increases the constrainting onf the forward model make much more challenging to find a solution allowing to fit the measurements. ~~It uses jointly all the available~~

690

~~measurements~~. The retrieved state is then consistent at the best with all the measurements associated with different viewing angles.

695 ~~On this basis, it is not suitable to compare the cost function of a mono-directional method where one value of COT fits one radianee and the cost function of a multi-angular method where one value of COT corresponds to 13 radianees. To overcome this problem, we compare~~To compare the ~~accuracy~~uncertainties of the ~~two~~ retrievals ~~by the response of the state vector to the errors, represented by, we use~~ the relative standard deviation (RSD) ~~to be consistent with the previous results~~. In Figure 12, we present the spatially average of the different types of errors, presented in section 4, for the mono-angular method (light green for COT and light blue for  $R_{\text{eff}}$ ) in comparison with the multi-angular method (dark green for COT and dark blue for  $R_{\text{eff}}$ ). We divide the source of errors in two panels, the left panel groups the lowest values of RSD and the right panel for the highest values of RSD.

Overall,  $R_{\text{eff}}$  uncertainties are larger than the one on COT for any type of error. In the left panel of Figure 12, the three fixed model parameters errors related to an incorrect estimation of the fixed parameters of the model are weak compared to the others and remain below 0.3% for mono-angular retrievals. As explained in section 4, the fixed altitude does not contribute to the uncertainty on the two retrieved parameters. The average uncertainties originating from the fixed value of  $v_{\text{eff}}$  are about 0.05% for COT and slightly higher (0.15%) for  $R_{\text{eff}}$  since  $v_{\text{eff}}$  affects the cloud bows that are also sensitive to  $R_{\text{eff}}$ . Concerning the surface wind speed, the uncertainties are around an average of 0.05%.

710 In the right panel, for mono-angular retrieval, the measurement error contributes to the uncertainty of about 8% on the retrieved COT and of about 12% on the retrieved  $R_{\text{eff}}$ . The uncertainties are reduced by a factor two with multi-angular retrieval. The multi-angular approach leads indeed to more information available for each cloudy pixel and each additional information reduces the uncertainty on the retrieved parameters in the presence of the same 5% random noise in the measurements.

715 The following two groups of bars correspond ~~to the~~ to the errors introduced by the ~~cloud~~ homogeneous assumption ~~used~~ in the forward model. They are the main source of errors. For mono-angular retrieval, the assumption of a vertical homogeneous profile contributes to an uncertainty of about 16% on COT and 54% on  $R_{\text{eff}}$ . These uncertainties are reduced by a factor four in the case of multi-angular retrieval. As discussed previously, the principal effects of 1D assumptions errors at the spatial resolution of OSIRIS come from the non-independence of the cloud columns that lead to smooth the 3D radiative fields. They lead to an uncertainty of 28% on COT and 45% on  $R_{\text{eff}}$  when a mono-angular instrument is used.

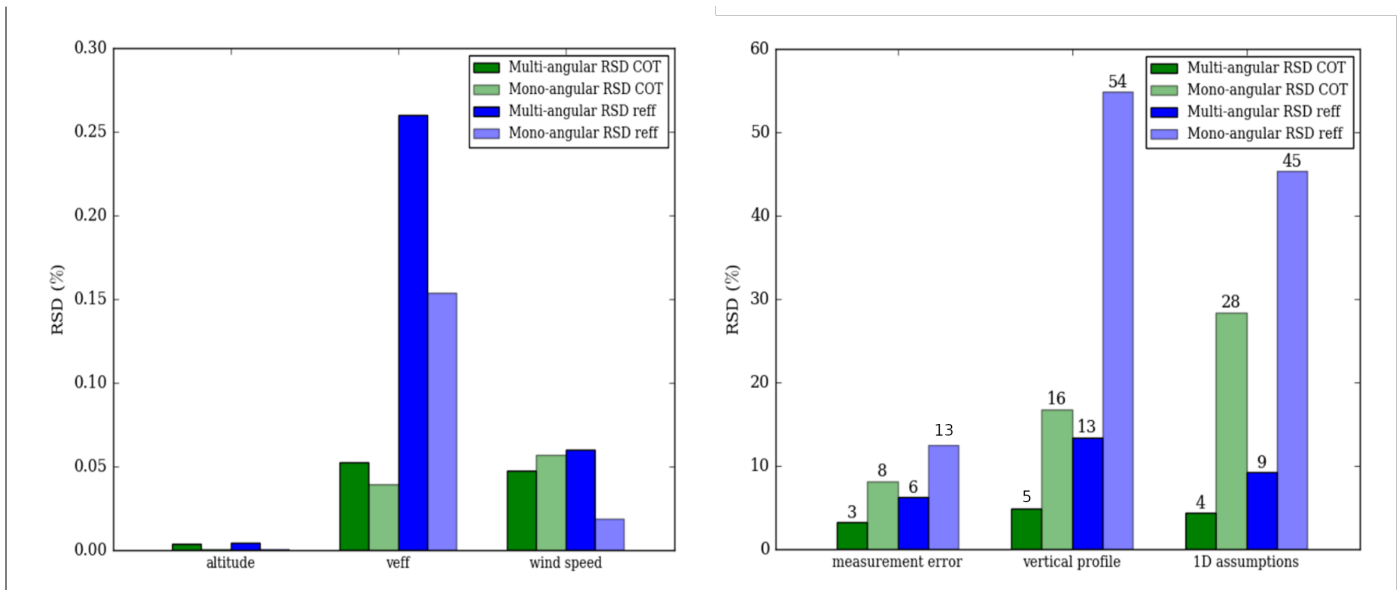

**Figure 12: Bar chart of the mean uncertainties of the retrieved COT and  $R_{\text{eff}}$ : green bars correspond to RSD COT and blue bars to RSD  $R_{\text{eff}}$ . Dark colors correspond to multi-angular retrieval and light colors to mono-angular retrieval. The errors originating from the fixed parameter errors are in the left panel and the measurements and forward model errors in the right panel.**

The multi-angular approach provides additional information for each pixel and constrains the forward model to match all the angular radiances at once. Indeed, the OSIRIS multi-angular characteristics have the advantage of decreasing the angular effects around the cloud bow directions—by adding the contribution of other geometries but also certainly to mitigate the sensitivity of the retrieval issued from the assumptions in the forward model. It avoids most of the failed convergences that occurred with the MODIS-like mono-angular bispectral method and retrieved more homogeneous and coherent COT and  $R_{\text{eff}}$  fields.

## 6 Conclusions

In this study, we present a method to retrieve two important microphysical and optical parameters of liquid clouds, COT and  $R_{\text{eff}}$  and their uncertainties using NIR/SWIR multi-angular airborne measurements. The algorithm is based on the mathematical framework of the optimal estimation method (Rodgers, 2000) and focuses on assessing the different uncertainties of the retrieved properties originating from different sources of errors.

The studied case uses the measurements of the airborne radiometer OSIRIS obtained during the CALIOSIRIS campaign. It consists of a monolayer water cloud located at 5 km altitude over the ocean with tilted solar incidence ( $\theta_s=59^\circ$ ).

In the first step of the retrieval, COT and  $R_{\text{eff}}$  are retrieved by considering only the measurement errors (without introducing any error linked to the forward model). The uncertainties originating from different sources of error are computed afterwards by using the previously retrieved COT and  $R_{\text{eff}}$ , and are decomposed into 3 different sources related to (a) the instrument measurement errors, (b) an incorrect estimation of the fixed model parameters such as the ocean surface wind, the cloud altitude and the effective variance of water droplets distribution, and (c) the errors

related to the vertically and horizontally homogeneous cloud assumptions. The computations are done using the multi-angular method and for comparison a mono-angular method, which is the usual approach in the operational algorithm ~~called here the MODIS-like algorithm was also applied~~.

745 In the multi-angular retrieval, a 5% measurement error contributes to around 3% of uncertainty on the retrieved COT and 6% on the retrieved  $R_{\text{eff}}$ . It increases with increasing values of COT and  $R_{\text{eff}}$  ~~for to~~ which the sensitivity of radiances starts to decrease. Since they are not characterized, the correlations between the measurements issued from different viewing angles are not considered in our retrieval, but they could increase these values. Nevertheless, These uncertainties are doubled when considering a mono-angular retrieval, these uncertainties are doubled.

750 The uncertainties related to the fixed parameters remain low with both mono or multi-angular retrieval. The largest one is due to the unknown value of the effective variance of the droplet size and is respectively equal to 0.15% and 0.25% for the mono and multi angular cases. Note that, since information provided by Lidar or polarized measurements was used, the uncertainty for the non-retrieved parameters was chosen to be low. For applications to other cases without these available information, errors would be higher. If the method is applied to 3MI for example,

755 the errors related to the cloud top altitude would be higher as the O2-A band leads to cloud top pressure uncertainties between 40 and 80hPa depending on the cloud types (Desmons et al. 2013). A more complex algorithm could also be used with a measurement vector including O2-A band radiances and multi-angular polarized radiances to have information on and to add the cloud top altitude and the effective variance (Huazhe et al. 2019) in the state vector.

This study clearly shows that the largest uncertainty is due to the homogeneous cloud assumption made in our forward model. First, the uncertainties related to the homogeneous vertical profile were quantified using a heterogeneous LWC profile with a triangle shape (known as quasi-adiabatic) composed of two adiabatic profiles. This more realistic profile takes into account the transition zone at the top of the cloud related to turbulent and evaporation processes. The scene averaged values reach 5% and 13% for COT and  $R_{\text{eff}}$  respectively in the multi-angular retrieval of our case study and go up to 13% and 54% for COT and  $R_{\text{eff}}$  respectively when using mono-

760 angular measurements. The largest uncertainties are obtained for the largest cloud optical thickness as the radiations sample only the higher layers of the cloud where the information is different between the homogeneous and heterogeneous vertical profiles.

The other sources of uncertainty related to the simplified cloud physical model comes from the radiatively non-independence of the cloudy columns that dominates at the high spatial resolution of OSIRIS. In the optically thin overcast cloud case, studied here, the scene average uncertainties originating from the 3D effects are 4% for COT and 9% for  $R_{\text{eff}}$  when using multi-angular measurements, and 28% for COT and 45% for  $R_{\text{eff}}$  when using mono-

770 angular measurements. The non-independence of the cloud columns dominates and tends to smooth the 3D radiative field compared to radiances computed with the independent pixel approximation.

775 The method was applied to real data, which means that the true cloud parameters are unknown. Consequently, it is not possible to know if real errors on the retrieved parameters are included in the uncertainties given by the method presented here. One reason that can lead to an erroneous assessment is that the estimations of the uncertainties are done around retrieved values than can be biased. A way to check the consistency of the method and the validity of

780 the uncertainty ranges would be to simulate radiances using Large Eddy Simulation model with realistic cloud physical description, add noise for the errors measurements and derive the cloud parameters and their uncertainties. Moreover, at the high solar incidence (59°), illumination and shadowing effects can be present. However, the use of multi-angular measurements mitigated their effects. Consequently, the uncertainties are lower when using multi-angular measurements.

785 ~~The method presented here addressed the exploitation of OSIRIS and~~ The method can be easily be adapted to the future 3MI imager. The first step that consists of including the uncertainties related to the measurement errors is directly implementable in an operational algorithm. The second step that consists of computing the uncertainties resulting from the non-retrieved parameters and from the cloudforward model is more computationally expensive but could also be included. The uncertainties related to the non-retrieved parameters, in addition to the one related to

790 measurement errors, have already been implemented since Collection 5 in MODIS operational algorithm through the computation of covariance matrix where Jacobian are derived from look-up table and was completed for Collection 6 (Platnick et al. 2017). ~~but~~ Concerning the forward model errors, the method cannot be implemented as in this work in an operational algorithm because of the prohibitive computation time. ~~can be applied to case studies. A~~ climatology based on several cases studies, depending of the type of clouds, land or ocean surface flag. ~~for example~~

795 could be used in order to obtain a distribution of the errors according to the cloudscene characteristics. ~~-~~

~~In addition,~~ The results obtained in this study show, not surprisingly regarding the numerous studies already published, that the vertical and horizontal homogeneity assumptions are major contributors to the retrieval uncertainties. One way to reduce it would be to define a more complex cloud model that can take into account the vertical and horizontal heterogeneity. This adds more complexity in the forward model as it would implies to retrieve

800 more sophisticated cloud parameters (e.g. extinction or effective size profile). It appears however possible given the important and complementary information provided by OSIRIS or 3MI measurements. ~~but more sophisticated retrieval methods need to be developed.~~ Recent studies were proposed to retrieved vertical profile using cloud side information (Ewald et al., 2018; Saito et al., 2019, Alexandrov et al., 2020) Saito et al., 2019, (Ewald et al., 2018; Saito et al., 2019, Alexandrov et al., 2020) Alexandrov et al., 2020) (Ewald et al., 2018; Saito et al., 2019, Alexandrov et al., 2020) or to

805 realize multi-pixels retrieval to account for the non-independence of the cloudy pixels (Martin et al., 2014; Okamura et al., 2017; Levis et al., 2015) and their implementation could be studied.



**Acknowledgements:** The authors thank Guillaume Merlin and Anthony Davis for fruitful discussions concerning the cloud vertical heterogeneous profile. This work has been supported by the Programme National de Télédétection Spatiale (PNTS, <http://www.insu.cnrs.fr/pnts>), grant n° PNTS-2017-03 and by the CPER research project CLIMIBIO. The authors thank the French Ministère de l'Enseignement Supérieur et de la Recherche, the Hauts-de-France Region and the European Funds for Regional Economical Development for their financial support to this project.

Airborne data were obtained using the aircraft managed by Safire, the French facility for airborne research, an infrastructure of the French National Center for Scientific Research (CNRS), Météo-France and the French National Center for Space Studies (CNES).

## References

- Alexandrov, M. D., Cairns, B., Emde, C., Ackerman, A. S., & van Diedenhoven, B. (2012). Accuracy assessments of cloud droplet size retrievals from polarized reflectance measurements by the research scanning polarimeter. *Remote Sensing of Environment*, 125, 92–111. <https://doi.org/10.1016/j.rse.2012.07.012>
- Alexandrov, M. D., Miller, D. J., Rajapakshe, C., Fridlind, A., van Diedenhoven, B., Cairns, B., Ackerman, A. S., & Zhang, Z. (2020). Vertical profiles of droplet size distributions derived from cloud-side observations by the research scanning polarimeter: Tests on simulated data. *Atmospheric Research*, 239(February), 104924. <https://doi.org/10.1016/j.atmosres.2020.104924>
- Auriol, F., Léon, J.-F., Balois, J.-Y., Verwaerde, C., François, P., Riedi, J., Parol, F., Waquet, F., Tanré, D., & Goloub, P. (2008). *Multidirectional visible and shortwave infrared polarimeter for atmospheric aerosol and cloud observation: OSIRIS (Observing System Including Polarisation in the Solar Infrared Spectrum)* (A. M. Larar, M. J. Lynch, & M. Suzuki, Eds.; p. 71491D). <https://doi.org/10.1117/12.806421>
- Benner, T. C., & Evans, K. F. (2001). Three-dimensional solar radiative transfer in small tropical cumulus fields derived from high-resolution imagery. *Journal of Geophysical Research: Atmospheres*, 106(D14), 14975–14984. <https://doi.org/10.1029/2001JD900158>
- Boucher, O., Randall, D., Artaxo, P., Bretherton, C., Feingold, G., Forster, P., Kerminen, V.-M., Kondo, Y., Liao, H., Lohmann, U., Raseh, P., Satheesh, S. K., Sherwood, S., Stevens, B., & Zhang, X. Y. (2013). *Clouds and Aerosols. In: Climate Change 2013: The Physical Science Basis. Contribution of Working Group I to the Fifth Assessment Report of the Intergovernmental Panel on Climate Change [Stocker et al. (eds.)]. Cambridge University Press.* <https://doi.org/10.1017/CBO9781107415324>
- IPCC, 2021: *Climate Change 2021: The Physical Science Basis. Contribution of Working Group I to the Sixth Assessment Report of the Intergovernmental Panel on Climate Change [Masson-Delmotte, V., P. Zhai, A. Pirani, S.L. Connors, C. Péan, S. Berger, N. Caud, Y. Chen, L. Goldfarb, M.I. Gomis, M. Huang, K. Leitzell, E. Lonnoy, J.B.R. Matthews, T.K. Maycock, T. Waterfield, O. Yelekçi, R. Yu, and B. Zhou (eds.)]. Cambridge University Press, Cambridge, United Kingdom and New York, NY, USA, In press, doi:10.1017/9781009157896*

- Bréon, F.-M., & Goloub, P. (1998). Cloud droplet effective radius from spaceborne polarization measurements. *Geophysical Research Letters*, 25(11), 1879–1882. <https://doi.org/10.1029/98GL01221>
- 845 [Bruneau D., Pelon J., Blouzon F., Spatazza J., Genau P., Buchholtz G., Amarouche N., Abchiche A., and Aouji O., \(2015\). 355-nm high spectral resolution airborne lidar LNG: system description and first results. \*Applied Optics\*, 54, 8776-8785. <https://doi.org/10.1364/AO.54.008776>](https://doi.org/10.1364/AO.54.008776)
- Buriez, J. C., Vanbauce, C., Parol, F., Goloub, P., Herman, M., Bonnel, B., Fouquart, Y., Couvert, P., & Seze, G. (1997). Cloud detection and derivation of cloud properties from POLDER. *International Journal of Remote Sensing*, 18(13), 2785–2813. <https://doi.org/10.1080/014311697217332>
- 850 Cahalan, R. F., Ridgway, W., Wiscombe, W. J., Gollmer, S., & Harshvardhan. (1994). Independent Pixel and Monte Carlo Estimates of Stratocumulus Albedo. *Journal of the Atmospheric Sciences*, 51(24), 3776–3790. [https://doi.org/10.1175/1520-0469\(1994\)051<3776:IPAMCE>2.0.CO;2](https://doi.org/10.1175/1520-0469(1994)051<3776:IPAMCE>2.0.CO;2)
- Chang, F. (2002). Estimating the vertical variation of cloud droplet effective radius using multispectral near-infrared satellite measurements. *Journal of Geophysical Research*, 107(D15), 4257. <https://doi.org/10.1029/2001JD000766>
- 855 Chang, I., & Christopher, S. A. (2016). Identifying Absorbing Aerosols above Clouds from the Spinning Enhanced Visible and Infrared Imager Coupled with NASA A-Train Multiple Sensors. *IEEE Transactions on Geoscience and Remote Sensing*, 54(6), 3163–3173. <https://doi.org/10.1109/TGRS.2015.2513015>
- 860 Cho, H., Zhang, Z., Meyer, K., Lebsock, M., Platnick, S., Ackerman, A. S., Di Girolamo, L., C.-Labonnote, L., Cornet, C., Riedi, J., & Holz, R. E. (2015). Frequency and causes of failed MODIS cloud property retrievals for liquid phase clouds over global oceans. *Journal of Geophysical Research: Atmospheres*, 120(9), 4132–4154. <https://doi.org/10.1002/2015JD023161>
- Cooper, S. J., L’Ecuyer, T. S., & Stephens, G. L. (2003). The impact of explicit cloud boundary information on ice cloud microphysical property retrievals from infrared radiances. *Journal of Geophysical Research: Atmospheres*, 108(D3), n/a–n/a. <https://doi.org/10.1029/2002JD002611>
- 865 Cornet, C., Buriez, J., Riédi, J., Isaka, H., & Guillemet, B. (2005). Case study of inhomogeneous cloud parameter retrieval from MODIS data. *Geophysical Research Letters*, 32(13), L13807. <https://doi.org/10.1029/2005GL022791>
- Cornet, C., C-Labonnote, L., & Szczap, F. (2010). Three-dimensional polarized Monte Carlo atmospheric radiative transfer model (3DMCPOL): 3D effects on polarized visible reflectances of a cirrus cloud. *Journal of Quantitative Spectroscopy and Radiative Transfer*, 111(1), 174–186. <https://doi.org/10.1016/j.jqsrt.2009.06.013>
- 870 Cornet, C., C-Labonnote, L., Waquet, F., Szczap, F., Deaconu, L., Parol, F., Vanbauce, C., Thieuleux, F., & Riédi, J. (2018). Cloud heterogeneity on cloud and aerosol above cloud properties retrieved from simulated total and polarized reflectances. *Atmospheric Measurement Techniques*, 11(6), 3627–3643. <https://doi.org/10.5194/amt-11-3627-2018>
- Cornet, C., & Davies, R. (2008). Use of MISR measurements to study the radiative transfer of an isolated convective cloud: Implications for cloud optical thickness retrieval. *Journal of Geophysical Research Atmospheres*, 113(4), 1–11. <https://doi.org/10.1029/2007JD008921>
- 875 Cox, C., & Munk, W. (1954). Measurement of the Roughness of the Sea Surface from Photographs of the Sun’s Glitter. *Journal of the Optical Society of America*, 44(11), 838. <https://doi.org/10.1364/JOSA.44.000838>
- Davis, A., Marshak, A., Cahalan, R., & Wiscombe, W. (1997). The Landsat Scale Break in Stratocumulus as a Three-Dimensional Radiative Transfer Effect: Implications for Cloud Remote Sensing. *Journal of the Atmospheric Sciences*, 54(2), 241–260. [https://doi.org/10.1175/1520-0469\(1997\)054<0241:TLSBIS>2.0.CO;2](https://doi.org/10.1175/1520-0469(1997)054<0241:TLSBIS>2.0.CO;2)

- 880 De Haan, J., Bosma, P., & Hovenier, J. (1987). The adding method for multiple scattering calculations of polarized light. *Astronomy and Astrophysics*, 183, 371–391.
- Deschamps, P.-Y., Breon, F.-M., Leroy, M., Podaire, A., Bricaud, A., Buriez, J.-C., & Seze, G. (1994). The POLDER mission: instrument characteristics and scientific objectives. *IEEE Transactions on Geoscience and Remote Sensing*, 32(3), 598–615. <https://doi.org/10.1109/36.297978>
- 885 [Desmons, M., Ferlay, N., Parol, F., Mcharek, L., and Vanbauce, C. \(2013\). Improved information about the vertical location and extent of monolayer clouds from POLDER3 measurements in the oxygen A-band. \*Atmospheric Measurement Technique\*, 6, 2221–2238. <https://doi.org/10.5194/amt-6-2221-2013>](#)
- Elsaesser, G. S., & Kummerow, C. D. (2008). Toward a Fully Parametric Retrieval of the Nonraining Parameters over the Global Oceans. *Journal of Applied Meteorology and Climatology*, 47(6), 1599–1618.
- 890 <https://doi.org/10.1175/2007JAMC1712.1>
- [Fauchez, T., Platnick, S., Várnai, T., Meyer, K., Cornet, C., and Szczap, F. \(2018\) : Scale dependence of cirrus heterogeneity effects. Part II: MODIS NIR and SWIR channels. \*Atmospheric Chemistry and Physics\*, 18, 12105–12121. <https://doi.org/10.5194/acp-18-12105-2018>.](#)
- Ewald, F., Zinner, T., Kölling, T., & Mayer, B. (2018). Remote Sensing of Cloud Droplet Radius Profiles using solar reflectance from cloud sides. Part I: Retrieval development and characterization. *Atmospheric Measurement Techniques Discussions*, 1–35. <https://doi.org/10.5194/amt-2018-234>
- 895 Formenti, P., D’Anna, B., Flamant, C., Mallet, M., Piketh, S. J., Schepanski, K., Waquet, F., Auriol, F., Brogniez, G., Burnet, F., Chaboureaud, J.-P., Chauvigné, A., Chazette, P., Denjean, C., Desboeufs, K., Doussin, J.-F., Elguindi, N., Feuerstein, S., Gaetani, M., ... Holben, B. (2019). The Aerosols, Radiation and Clouds in Southern Africa Field Campaign in
- 900 Namibia: Overview, Illustrative Observations, and Way Forward. *Bulletin of the American Meteorological Society*, 100(7), 1277–1298. <https://doi.org/10.1175/BAMS-D-17-0278.1>
- Garnier, A., Pelon, J., Dubuisson, P., Faivre, M., Chomette, O., Pascal, N., & Kratz, D. P. (2012). Retrieval of Cloud Properties Using CALIPSO Imaging Infrared Radiometer. Part I: Effective Emissivity and Optical Depth. *Journal of Applied Meteorology and Climatology*, 51(7), 1407–1425. <https://doi.org/10.1175/JAMC-D-11-0220.1>
- 905 Giraud, V., Buriez, J. C., Fouquart, Y., Parol, F., & Seze, G. (1997). Large-scale analysis of cirrus clouds from AVHRR data: Assessment of both a microphysical index and the cloud-top temperature. *Journal of Applied Meteorology*, 36(6), 664–675. <https://doi.org/10.1175/1520-0450-36.6.664>
- [Hagolle O, Goloub, P, Deschamps, P-Y., Cosnefroy H., Briottet X., Bailleul T., Nicolas J-M, Parol F., Lafrance B., and Herman M. \(1999\). Results of POLDER in-flight calibration, \*IEEE Transactions on Geoscience and Remote Sensing\*, vol. 37, no. 3, <https://doi.org/10.1109/36.763266>.](#)
- 910 Hansen, J. E., & Travis, L. D. (1974). Light scattering in planetary atmospheres. *Space Science Reviews*, 16(4), 527–610. <https://doi.org/10.1007/BF00168069>
- Hickey, J. R., & Karoli, A. R. (1974). Radiometric Calibrations for the Earth Radiation Budget Experiment. *Applied Optics*, 13(3), 523. <https://doi.org/10.1364/AO.13.000523>
- 915 [Huazhe S., Letu H., Bréon F.-M., Riedi J., Ma R., Wang, Z., Nakajima T. Y., Wang Z., Chen L. \(2019\). An improved algorithm of cloud droplet size distribution from POLDER polarized measurements. \*Remote Sensing of Environment\*. <https://doi.org/10.1016/j.rse.2019.04.013>.](#)

- Inoue, T. (1985). On the Temperature and Effective Emissivity Determination of Semi-Transparent Cirrus Clouds by Bi-Spectral Measurements in the 10 $\mu$ m Window Region. *Journal of the Meteorological Society of Japan. Ser. II*, 63(1), 88–99. [https://doi.org/10.2151/jmsj1965.63.1\\_88](https://doi.org/10.2151/jmsj1965.63.1_88)
- 920 Iwabuchi, H., Saito, M., Tokoro, Y., Putri, N. S., & Sekiguchi, M. (2016). Retrieval of radiative and microphysical properties of clouds from multispectral infrared measurements. *Progress in Earth and Planetary Science*, 3(1), 32. <https://doi.org/10.1186/s40645-016-0108-3>
- Kato, S., & Marshak, A. (2009). Solar zenith and viewing geometry-dependent errors in satellite retrieved cloud optical thickness: Marine stratocumulus case. *Journal of Geophysical Research: Atmospheres*, 114(D1), 1–13. <https://doi.org/10.1029/2008JD010579>
- 925 Kaufman, Y. J., Tanré, D., & Boucher, O. (2002). A satellite view of aerosols in the climate system. *Nature*, 419(6903), 215–223. <https://doi.org/10.1038/nature01091>
- Kokhanovsky, A., & Rozanov, V. V. (2012). Atmospheric Measurement Techniques Droplet vertical sizing in warm clouds using passive optical measurements from a satellite. *Atmos. Meas. Tech*, 5, 517–528. <https://doi.org/10.5194/amt-5-517-2012>
- 930 [Kollias, P., Szyrmer, W., Rémillard, J., and Luke, E. \(2011\). Cloud radar Doppler spectra in drizzling stratiform clouds: 2. Observations and microphysical modeling of drizzle evolution, \*Journal of Geophysical Research: Atmospheres\*, 116, D13203, doi:10.1029/2010JD015238.](https://doi.org/10.1029/2010JD015238)
- 935 Levenberg, K. (1944). A method for the solution of certain non-linear problems in least squares. *Quarterly of Applied Mathematics*, 2(2), 164–168. <https://doi.org/10.1090/qam/10666>
- Levis, A., Schechner, Y. Y., Aides, A., & Davis, A. B. (2015). *An Efficient Approach for Optical Radiative Transfer Tomography using the Spherical Harmonics Discrete Ordinates Method*. 1–17.
- Lohmann, U., & Feichter, J. (2005). Global indirect aerosol effects: a review. *Atmospheric Chemistry and Physics*, 5(3), 715–737. <https://doi.org/10.5194/acp-5-715-2005>
- 940 Mallet, M., Dulac, F., Formenti, P., Nabat, P., Sciare, J., Roberts, G., Pelon, J., Ancellet, G., Tanré, D., Parol, F., Denjean, C., Brogniez, G., di Sarra, A., Alados-Arboledas, L., Arndt, J., Auriol, F., Blarel, L., Bourriane, T., Chazette, P., ... Zapf, P. (2016). Overview of the Chemistry-Aerosol Mediterranean Experiment/Aerosol Direct Radiative Forcing on the Mediterranean Climate (ChArMEx/ADRIMED) summer 2013 campaign. *Atmospheric Chemistry and Physics*, 16(2), 455–504. <https://doi.org/10.5194/acp-16-455-2016>
- 945 Marquardt, D. W. (1963). An Algorithm for Least-Squares Estimation of Nonlinear Parameters. *Journal of the Society for Industrial and Applied Mathematics*, 11(2), 431–441. <https://doi.org/10.1137/0111030>
- Marshak, A., Davis, A., Wiscombe, W., & Cahalan, R. (1995). Radiative smoothing in fractal clouds. *Journal of Geophysical Research*, 100(D12), 26247. <https://doi.org/10.1029/95JD02895>
- 950 Marshak, A., Davis, A., Wiscombe, W., & Titov, G. (1995). The verisimilitude of the independent pixel approximation used in cloud remote sensing. *Remote Sensing of Environment*, 52(1), 71–78. [https://doi.org/10.1016/0034-4257\(95\)00016-T](https://doi.org/10.1016/0034-4257(95)00016-T)
- Marshak, A., Martins, J. V, Zubko, V., & Kaufman, Y. J. (2006). Atmospheric Chemistry and Physics What does reflection from cloud sides tell us about vertical distribution of cloud droplet sizes? In *Atmos. Chem. Phys* (Vol. 6).
- 955 Marshak, A., Platnick, S., Várnai, T., Wen, G., & Cahalan, R. F. (2006). Impact of three-dimensional radiative effects on satellite retrievals of cloud droplet sizes. *Journal of Geophysical Research*, 111(D9), D09207. <https://doi.org/10.1029/2005JD006686>

- Martin, W., Cairns, B., & Bal, G. (2014). Adjoint methods for adjusting three-dimensional atmosphere and surface properties to fit multi-angle/multi-pixel polarimetric measurements. *Journal of Quantitative Spectroscopy and Radiative Transfer*, 144(February), 68–85. <https://doi.org/10.1016/j.jqsrt.2014.03.030>
- 960 McClatchey, R. A., Fenn, R. W., Selby, J. E. A., Volz, F. E., & Garing, J. S. (1972). *Optical Properties of the Atmosphere (Third Edition)*.
- Merlin, G. (2016). *Préparation à l'exploitation des observations multi-spectrales, multi-angulaires et polarisées de l'instrument 3MI pour les atmosphères nuageuses*. University of Lille.
- Miles, N. L., Verlinde, J., & Clothiaux, E. E. (2000). *Cloud Droplet Size Distributions in Low-Level Stratiform Clouds*.
- 965 Miller, D. J., Zhang, Z., Ackerman, A. S., Platnick, S., & Baum, B. A. (2016). The impact of cloud vertical profile on liquid water path retrieval based on the bispectral method: A theoretical study based on large-eddy simulations of shallow marine boundary layer clouds. *Journal of Geophysical Research: Atmospheres*, 121(8), 4122–4141. <https://doi.org/10.1002/2015JD024322>
- Nakajima, T., & King, M. D. (1990). Determination of the Optical Thickness and Effective Particle Radius of Clouds from Reflected Solar Radiation Measurements. Part I: Theory. *Journal of the Atmospheric Sciences*, 47(15), 1878–1893. [https://doi.org/10.1175/1520-0469\(1990\)047<1878:DOTOTA>2.0.CO;2](https://doi.org/10.1175/1520-0469(1990)047<1878:DOTOTA>2.0.CO;2)
- 970 Nakajima, T. Y., Suzuki, K., & Stephens, G. L. (2010). Droplet Growth in Warm Water Clouds Observed by the A-Train. Part II: A Multisensor View. *Journal of the Atmospheric Sciences*, 67(6), 1897–1907. <https://doi.org/10.1175/2010JAS3276.1>
- Okamura, R., Iwabuchi, H., & Sebastian Schmidt, K. (2017). Feasibility study of multi-pixel retrieval of optical thickness and droplet effective radius of inhomogeneous clouds using deep learning. *Atmospheric Measurement Techniques*, 10(12), 4747–4759. <https://doi.org/10.5194/amt-10-4747-2017>
- 975 Oreopoulos, L., & Davies, R. (1998). Plane Parallel Albedo Biases from Satellite Observations. Part I: Dependence on Resolution and Other Factors. *Journal of Climate*, 11(5), 919–932. [https://doi.org/10.1175/1520-0442\(1998\)011<0919:PPABFS>2.0.CO;2](https://doi.org/10.1175/1520-0442(1998)011<0919:PPABFS>2.0.CO;2)
- 980 Oreopoulos, L., & Platnick, S. (2008). Radiative susceptibility of cloudy atmospheres to droplet number perturbations: 2. Global analysis from MODIS. *Journal of Geophysical Research*, 113(D14), D14S21. <https://doi.org/10.1029/2007JD009655>
- Parol, F., Buriez, J. C., Brogniez, G., & Fouquart, Y. (1991). Information Content of AVHRR Channels 4 and 5 with Respect to the Effective Radius of Cirrus Cloud Particles. *Journal of Applied Meteorology*, 30(7), 973–984. <https://doi.org/10.1175/1520-0450-30.7.973>
- 985 Platnick, S. (2000). Vertical photon transport in cloud remote sensing problems. *Journal of Geophysical Research: Atmospheres*, 105(D18), 22919–22935. <https://doi.org/10.1029/2000JD900333>
- Platnick, S., King, M. D., Ackerman, S. A., Menzel, W. P., Baum, B. A., Riedi, J. C., & Frey, R. A. (2003). The MODIS cloud products: algorithms and examples from terra. *IEEE Transactions on Geoscience and Remote Sensing*, 41(2), 459–473. <https://doi.org/10.1109/TGRS.2002.808301>
- 990 Poulsen, C. A., Siddans, R., Thomas, G. E., Sayer, A. M., Grainger, R. G., Campmany, E., Dean, S. M., Arnold, C., & Watts, P. D. (2012). Cloud retrievals from satellite data using optimal estimation: evaluation and application to ATSR. *Atmospheric Measurement Techniques*, 5(8), 1889–1910. <https://doi.org/10.5194/amt-5-1889-2012>
- Rivoire, L., Birner, T., Knaff, J. A., & Tourville, N. (2020). Quantifying the Radiative Impact of Clouds on Tropopause Layer Cooling in Tropical Cyclones. *Journal of Climate*, 33(15), 6361–6376. <https://doi.org/10.1175/JCLI-D-19-0813.1>
- 995 Rodgers, C. D. (1976). Retrieval of atmospheric temperature and composition from remote measurements of thermal radiation. *Reviews of Geophysics*, 14(4), 609. <https://doi.org/10.1029/RG014i004p00609>

- Rodgers, C. D. (2000). Inverse methods for atmospheric sounding: Theory and Practice/Series on Atmospheric, Oceanic and Planetary Physics. In *Inverse Methods for Atmospheric Sounding* (Vol. 2). WORLD SCIENTIFIC. [https://doi.org/10.1142/9789812813718\\_0001](https://doi.org/10.1142/9789812813718_0001)
- 1000 [Saito, M., Yang, P., Hu, Y., Liu, X., Loeb, N., Smith Jr, W. L., & Minnis, P. \(2019\). An efficient method for microphysical property retrievals in vertically inhomogeneous marine water clouds using MODIS-CloudSat measurements. \*Journal of Geophysical Research: Atmospheres\*, 124, 2174–2193. <https://doi.org/10.1029/2018JD029659>](https://doi.org/10.1029/2018JD029659)
- 1005 Seethala, C., & Horváth, Á. (2010). Global assessment of AMSR-E and MODIS cloud liquid water path retrievals in warm oceanic clouds. *Journal of Geophysical Research*, 115(D13), D13202. <https://doi.org/10.1029/2009JD012662>
- Sourdeval, O., C.-Labonnote, L., Baran, A. J., & Brogniez, G. (2015). A methodology for simultaneous retrieval of ice and liquid water cloud properties. Part I: Information content and case study. *Quarterly Journal of the Royal Meteorological Society*, 141(688), 870–882. <https://doi.org/10.1002/qj.2405>
- 1010 Sourdeval, O., -Labonnote, L. C., Brogniez, G., Jourdan, O., Pelon, J., & Garnier, A. (2013). A variational approach for retrieving ice cloud properties from infrared measurements: application in the context of two IIR validation campaigns. *Atmospheric Chemistry and Physics*, 13(16), 8229–8244. <https://doi.org/10.5194/acp-13-8229-2013>
- Szczap, F., Isaka, H., Saute, M., Guillemet, B., & Ioltukhovski, A. (2000). Effective radiative properties of bounded cascade absorbing clouds: Definition of an effective single-scattering albedo. *Journal of Geophysical Research: Atmospheres*, 105(D16), 20635–20648. <https://doi.org/10.1029/2000JD900145>
- 1015 Takahashi, H., Lebsock, M., Suzuki, K., Stephens, G., & Wang, M. (2017). An investigation of microphysics and subgrid-scale variability in warm-rain clouds using the A-Train observations and a multiscale modeling framework. *Journal of Geophysical Research: Atmospheres*, 122(14), 7493–7504. <https://doi.org/10.1002/2016JD026404>
- Twomey, S. (1991). Aerosols, clouds and radiation. *Atmospheric Environment. Part A. General Topics*, 25(11), 2435–2442. [https://doi.org/10.1016/0960-1686\(91\)90159-5](https://doi.org/10.1016/0960-1686(91)90159-5)
- 1020 Van de Hulst, H. C. (1963). *A new look at multiple scattering*. Tech. Rep., Goddard Institute for Space Studies, NASA TM-I03044.
- Várnai, T. (2000). Influence of three-dimensional radiative effects on the spatial distribution of shortwave cloud reflection. *Journal of the Atmospheric Sciences*, 57(2), 216–229. [https://doi.org/10.1175/1520-0469\(2000\)057<0216:IOTDRE>2.0.CO;2](https://doi.org/10.1175/1520-0469(2000)057<0216:IOTDRE>2.0.CO;2)
- 1025 Várnai, T., & Davies, R. (1999). Effects of Cloud Heterogeneities on Shortwave Radiation: Comparison of Cloud-Top Variability and Internal Heterogeneity. *Journal of the Atmospheric Sciences*, 56(24), 4206–4224. [https://doi.org/10.1175/1520-0469\(1999\)056<4206:EOCHOS>2.0.CO;2](https://doi.org/10.1175/1520-0469(1999)056<4206:EOCHOS>2.0.CO;2)
- Várnai, T., & Marshak, A. (2002). Observations of Three-Dimensional Radiative Effects that Influence MODIS Cloud Optical Thickness Retrievals. *Journal of the Atmospheric Sciences*, 59(9), 1607–1618. [https://doi.org/10.1175/1520-0469\(2002\)059<1607:OOTDRE>2.0.CO;2](https://doi.org/10.1175/1520-0469(2002)059<1607:OOTDRE>2.0.CO;2)
- 1030 Várnai, T., & Marshak, A. (2003). A method for analyzing how various parts of clouds influence each other's brightness. *Journal of Geophysical Research*, 108(D22), 4706. <https://doi.org/10.1029/2003JD003561>
- Várnai, T., & Marshak, A. (2007). View angle dependence of cloud optical thicknesses retrieved by Moderate Resolution Imaging Spectroradiometer (MODIS). *Journal of Geophysical Research Atmospheres*, 112(6), 1–12. <https://doi.org/10.1029/2005JD006912>
- 1035

Várnai, T., & Marshak, A. (2009). MODIS observations of enhanced clear sky reflectance near clouds. *Geophysical Research Letters*, 36(6), L06807. <https://doi.org/10.1029/2008GL037089>

Walther, A. and Heidinger A. K. (2012). Implementation of the Daytime Cloud Optical and Microphysical Properties Algorithm (DCOMP) in PATMOS-x. *Journal of Applied Meteorology and Climatology*. 51, <http://www.jstor.org/stable/26175210>

1040 Wang, C., Platnick, S., Zhang, Z., Meyer, K., & Yang, P. (2016). Retrieval of ice cloud properties using an optimal estimation algorithm and MODIS infrared observations: 1. Forward model, error analysis, and information content. *Journal of Geophysical Research: Atmospheres*, 121(10), 5809–5826. <https://doi.org/10.1002/2015JD024526>

Wood, R. (2005). Drizzle in Stratiform Boundary Layer Clouds. Part II: Microphysical Aspects. *Journal of the Atmospheric Sciences*, 62(9), 3034–3050. <https://doi.org/10.1175/JAS3530.1>

1045 Yang, Q., Fu, Q., & Hu, Y. (2010). Radiative impacts of clouds in the tropical tropopause layer. *Journal of Geophysical Research Atmospheres*, 115(4), 1–21. <https://doi.org/10.1029/2009JD012393>

Zhang, Y., Xie, S., Lin, W., Klein, S. A., Zelinka, M., Ma, P., Rasch, P. J., Qian, Y., Tang, Q., & Ma, H. (2019). Evaluation of Clouds in Version 1 of the E3SM Atmosphere Model With Satellite Simulators. *Journal of Advances in Modeling Earth Systems*, 11(5), 1253–1268. <https://doi.org/10.1029/2018MS001562>

1050 Zhang, Z., Ackerman, A. S., Feingold, G., Platnick, S., Pincus, R., & Xue, H. (2012). Effects of cloud horizontal inhomogeneity and drizzle on remote sensing of cloud droplet effective radius: Case studies based on large-eddy simulations. *Journal of Geophysical Research: Atmospheres*, 117(D19), n/a-n/a. <https://doi.org/10.1029/2012JD017655>

Zhang, Z., & Platnick, S. (2011). An assessment of differences between cloud effective particle radius retrievals for marine water clouds from three MODIS spectral bands. *Journal of Geophysical Research*, 116(D20), D20215. <https://doi.org/10.1029/2011JD016216>

1055 Zinner, T., & Mayer, B. (2006). Remote sensing of stratocumulus clouds: Uncertainties and biases due to inhomogeneity. *Journal of Geophysical Research*, 111(D14), D14209. <https://doi.org/10.1029/2005JD006955>

1060

1065
